# Supplementary material for: Substituted fullerenes as a promising capping ligand towards stabilization of exohedral Dy(iii) based single-ion magnets: a theoretical study
Source: Royal Society of Chemistry journal article supplement (doi:10.1039/d4dt02090a), 2024-01-01
Supplement: d4dt02090a1.pdf [file d4dt02090a1.pdf]

## SUPPORTING INFORMATION

# Substituted Fullerenes as a Promising Capping Ligand Towards Stabilization of Exohedral Dy(III) Based Single-Ion Magnets: A Theoretical Study

*Kusum Kumari and Saurabh Kumar Singh\**

---

K. Kumari, Dr. S. K. Singh

Department of Chemistry

Indian Institute of Technology, Hyderabad.

Kandi, Sangareddy, Telangana, India, 502284

E-mail: [sksingh@chy.iith.ac.in](mailto:sksingh@chy.iith.ac.in)

## SUPPORTING INFORMATION

### Contents

|                                                                                                                                                                                                                                                                                                                                                                                                                                                                                                         |    |
|---------------------------------------------------------------------------------------------------------------------------------------------------------------------------------------------------------------------------------------------------------------------------------------------------------------------------------------------------------------------------------------------------------------------------------------------------------------------------------------------------------|----|
| <b>Table S1:</b> Selected bond parameters of the complexes studied. (X= CCH <sub>3</sub> ) Bond distances are taken from the centroid of C <sub>m</sub> H <sub>m</sub> rings.....                                                                                                                                                                                                                                                                                                                       | 4  |
| <b>Table S2:</b> PBE0 computed HOMO, LUMO, and spin densities of complexes <b>1-8</b> .....                                                                                                                                                                                                                                                                                                                                                                                                             | 4  |
| <b>Figure S1:</b> AILFT computed 4 <i>f</i> -orbital splitting pattern for complexes <b>1-8</b> .....                                                                                                                                                                                                                                                                                                                                                                                                   | 5  |
| <b>Figure S2:</b> Comparison of CASSCF computed Mulliken charges on the five membered rings of <b>3a</b> , <b>3</b> and <b>6</b> with their corresponding U <sub>cal</sub> .....                                                                                                                                                                                                                                                                                                                        | 6  |
| <b>Figure S3:</b> CASSCF computed Mulliken charges on the first coordination sphere for complexes <b>1-8</b> . Colour code: green (Dy), blue (N), pink (B), grey (C), white (H).....                                                                                                                                                                                                                                                                                                                    | 7  |
| <b>Table S3:</b> PBE0-D3(BJ)/DKH-def2-TZVP computed gas phase formation energies(ΔE), enthalpies(ΔH), and free energies (ΔG) for complexes <b>1-8</b> at 298.15 K.....                                                                                                                                                                                                                                                                                                                                  | 7  |
| <b>Table S4:</b> BP86-D3(BJ)/DKH-def2-TZVP computed gas phase formation energies(ΔE), enthalpies(ΔH), and free energies (ΔG) for complexes <b>1-8</b> at 298.15 K.....                                                                                                                                                                                                                                                                                                                                  | 8  |
| <b>Table S5:</b> Contribution (%) of decomposition energies to Total Binding Energy for complexes <b>1-8</b> .....                                                                                                                                                                                                                                                                                                                                                                                      | 8  |
| <b>Table S6:</b> PBE0 computed NPA charges on the coordinated C <sub>m</sub> H <sub>m</sub> , five-membered ring and subsequent neighbour atoms in complexes <b>1-8</b> . ....                                                                                                                                                                                                                                                                                                                          | 8  |
| <b>Table S7:</b> ETS-NOCV derived first four strongest electron deformation densities (ΔE <sub>orb(1)</sub> to ΔE <sub>orb(4)</sub> ) at the PBE0-D3(BJ)/TZP level. Isosurface values are 0.0001 au. The direction of the charge flow of the deformation densities is from red to blue. The ΔE <sub>orb</sub> energies are in kcal/mol. The eigenvalues v <sub>i</sub> give the size of the charge migration. ....                                                                                      | 9  |
| <b>Table S8:</b> Natural Population Analysis of Dy(III) ion complex <b>1-8</b> along with the Dy(III) free ion. ....                                                                                                                                                                                                                                                                                                                                                                                    | 10 |
| <b>Table S9:</b> Topological parameters obtained through QTAIM analysis for the Dy-C <sub>ligand</sub> bonds in complexes <b>1-8</b> . <sup>a</sup> The electron density at the bond critical density (BCP), <sup>b</sup> The Laplacian of the electron density at the BCP, <sup>c</sup> The Virial Field function, <sup>d</sup> The electronic kinetic energy density, <sup>e</sup> Ratio of Virial field function to Electronic kinetic energy, <sup>f</sup> The total energy density at the BCP..... | 11 |
| <b>Table S10:</b> CASSCF computed spin-free and SOC states and corresponding g-tensor values for the low-lying eight KDs for complexes <b>1</b> and <b>2</b> . All the energies are reported in cm <sup>-1</sup> . ....                                                                                                                                                                                                                                                                                 | 13 |
| <b>Table S11:</b> CASSCF computed spin-free and SOC states and corresponding g-tensor values for the low-lying eight KDs for complexes <b>2a</b> and <b>3a</b> . All the energies are reported in cm <sup>-1</sup> . ....                                                                                                                                                                                                                                                                               | 13 |
| <b>Table S12:</b> CASSCF computed spin-free and SOC states and corresponding g-tensor values for the low-lying eight KDs for complexes <b>3</b> and <b>4</b> . All the energies are reported in cm <sup>-1</sup> . ....                                                                                                                                                                                                                                                                                 | 14 |
| <b>Table S13:</b> CASSCF computed spin-free and SOC states and corresponding g-tensor values for the low-lying eight KDs for complexes <b>5</b> and <b>6</b> . All the energies are reported in cm <sup>-1</sup> . ....                                                                                                                                                                                                                                                                                 | 14 |
| <b>Table S14:</b> CASSCF computed spin-free and SOC states and corresponding g-tensor values for the low-lying eight KDs for complexes <b>7</b> and <b>8</b> . All the energies are reported in cm <sup>-1</sup> . ....                                                                                                                                                                                                                                                                                 | 15 |
| <b>Table S15:</b> SINGLE_ANISO computed wave function decomposition analysis of complexes <b>1-8</b> .....                                                                                                                                                                                                                                                                                                                                                                                              | 15 |
| <b>Figure S4:</b> Temperature dependence of calculated U <sub>eff</sub> and relative contribution of each Kramer's doublet to the relaxation calculated as k <sub>i</sub> (T)/N <sub>k</sub> for complexes <b>1(a)</b> , <b>2(b)</b> , <b>4(c)</b> , <b>7(d)</b> . ....                                                                                                                                                                                                                                 | 17 |
| <b>Table S16:</b> Effective demagnetization barrier (U <sub>eff</sub> ) with the three most contributing KDs to the barrier heights. ....                                                                                                                                                                                                                                                                                                                                                               | 18 |

## SUPPORTING INFORMATION

**Table S17:** SINGLE\_ANISO computed crystal field parameters for **1–8**. The CF parameters were computed using the following equation,  $HCF = \sum k = -qqBkqOkq$  and here  $Bkq$  and  $Okq$  are the crystal field parameters and Steven's operator, respectively. .... 18

**Table S18:** Comparison of CASSCF computed SOC states and corresponding  $g$ -tensor values for the low-lying eight KDs for complexes **1–8** with a) 21 sextets and b) 21 sextet, 224 quartets and 490 doublets. All the energies are reported in  $\text{cm}^{-1}$ . .... 20

**Table S19:** DFT optimized coordinates of complexes **1–8**. .... 22

**Reference** ..... 29

**Input files** ..... 30

## SUPPORTING INFORMATION

**Table S1:** Selected bond parameters of the complexes studied. (X= CCH<sub>3</sub>) Bond distances are taken from the centroid of C<sub>m</sub>H<sub>m</sub> rings.

| Complex                                                                                                                         | Dy-<br>L <sub>cent1</sub> (Å) | Dy-<br>L <sub>cent2</sub> (Å) | Avg. Dy-L <sub>cent</sub> (Å) | ∠L <sub>cent1</sub> -Dy-L <sub>cent2</sub> (°) |
|---------------------------------------------------------------------------------------------------------------------------------|-------------------------------|-------------------------------|-------------------------------|------------------------------------------------|
| [Dy(η <sup>5</sup> -C <sub>55</sub> X <sub>5</sub> ) (C <sub>4</sub> H <sub>4</sub> )] ( <b>1</b> )                             | 2.382                         | 2.325                         | 2.354                         | 156.9                                          |
| [Dy(η <sup>5</sup> -C <sub>55</sub> X <sub>5</sub> ) (C <sub>5</sub> H <sub>5</sub> )] <sup>+</sup> ( <b>2</b> )                | 2.302                         | 2.301                         | 2.302                         | 145.2                                          |
| [Dy (C <sub>p</sub> ) <sub>2</sub> ] <sup>+</sup> ( <b>2a</b> )                                                                 | 2.299                         | 2.297                         | 2.298                         | 128.9                                          |
| [Dy(η <sup>5</sup> -C <sub>55</sub> X <sub>5</sub> ) (Cp*) <sub>2</sub> ] <sup>+</sup> ( <b>3</b> )                             | 2.269                         | 2.308                         | 2.289                         | 160.8                                          |
| [Dy (C <sub>5</sub> (CH <sub>3</sub> ) <sub>5</sub> ) <sub>2</sub> ] <sup>+</sup> ( <b>3a</b> )                                 | 2.268                         | 2.273                         | 2.270                         | 148                                            |
| [Dy(η <sup>5</sup> -C <sub>55</sub> X <sub>5</sub> ) (C <sub>6</sub> H <sub>6</sub> ) <sub>2</sub> ] <sup>2+</sup> ( <b>4</b> ) | 2.235                         | 2.296                         | 2.266                         | 152.7                                          |
| [Dy(η <sup>5</sup> -C <sub>55</sub> X <sub>5</sub> ) (C <sub>8</sub> H <sub>8</sub> )] ( <b>5</b> )                             | 1.743                         | 2.333                         | 2.038                         | 179.4                                          |
| [Dy(η <sup>5</sup> -C <sub>55</sub> X <sub>5</sub> ) (C <sub>60</sub> <sup>*</sup> )] <sup>+</sup> ( <b>6</b> )                 | 2.351                         | 2.351                         | 2.351                         | 179.7                                          |
| [Dy(η <sup>5</sup> -C <sub>55</sub> B <sub>5</sub> ) <sub>2</sub> ] <sup>+</sup> ( <b>7</b> )                                   | 2.284                         | 2.284                         | 2.284                         | 179.6                                          |
| [Dy(η <sup>5</sup> -C <sub>55</sub> N <sub>5</sub> ) <sub>2</sub> ] <sup>+</sup> ( <b>8</b> )                                   | 2.390                         | 2.389                         | 2.389                         | 179.5                                          |
| [Cp*DyCOT] (taken from reference 1)                                                                                             | 1.772                         | 2.995                         | 2.383                         | 171.9                                          |

**Table S2:** PBE0 computed HOMO, LUMO, and spin densities of complexes **1-8**.

| Complex  | HOMO                                                                                | LUMO                                                                                 | Spin-density                                                                                        |
|----------|-------------------------------------------------------------------------------------|--------------------------------------------------------------------------------------|-----------------------------------------------------------------------------------------------------|
| <b>1</b> | 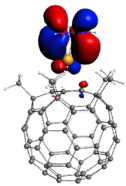  |   | <br>ρ = 5.0566  |
| <b>2</b> |  |  | <br>ρ = 5.0611 |
| <b>3</b> |  |  | <br>ρ = 5.0257 |
| <b>4</b> |  |  | <br>ρ = 5.4438 |

# SUPPORTING INFORMATION

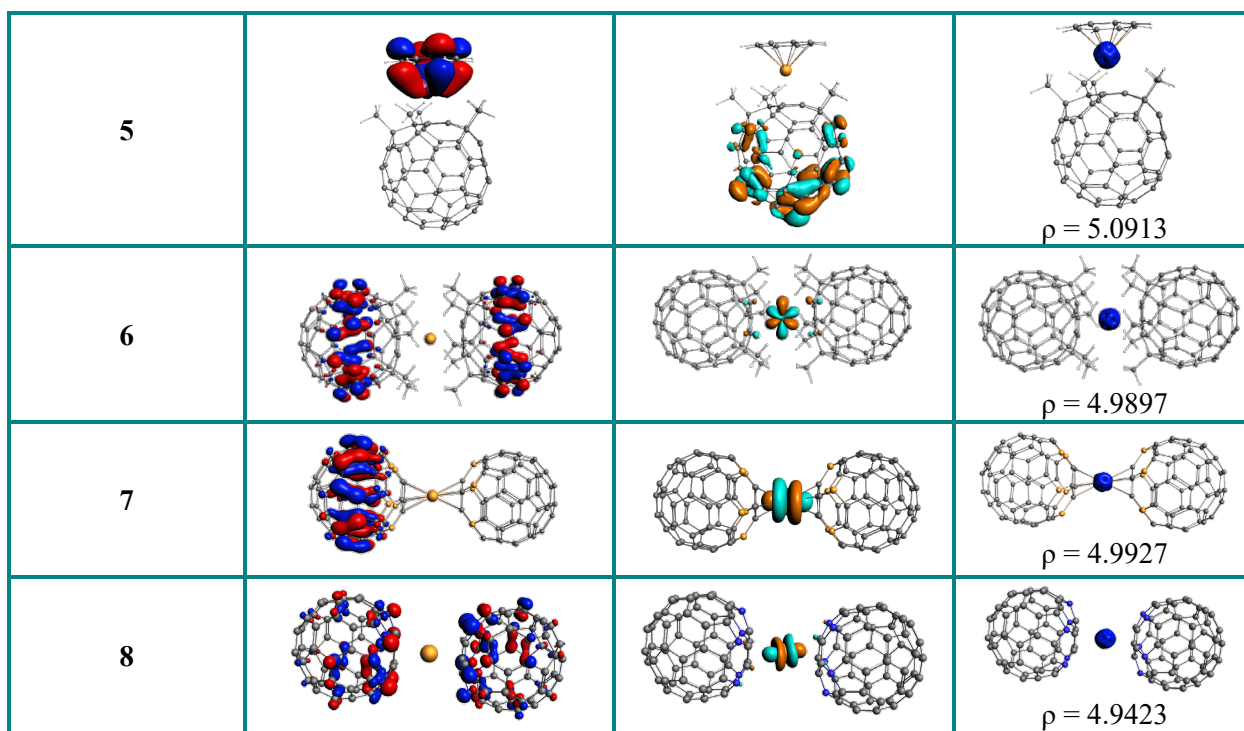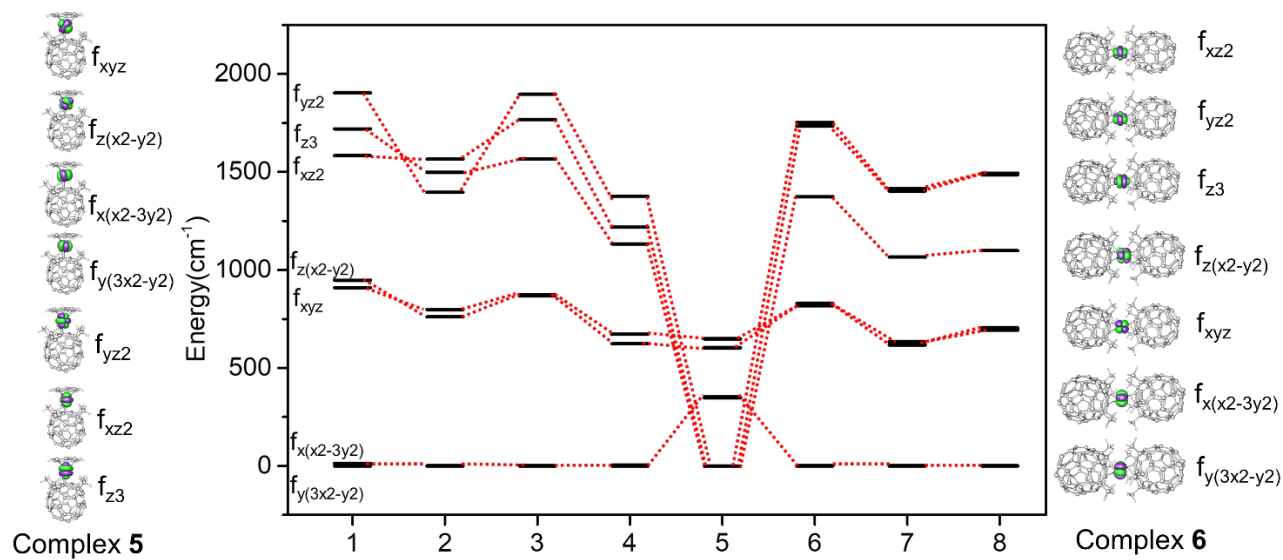

**Figure S1:** AILFT computed 4f-orbital splitting pattern for complexes 1-8.

## SUPPORTING INFORMATION

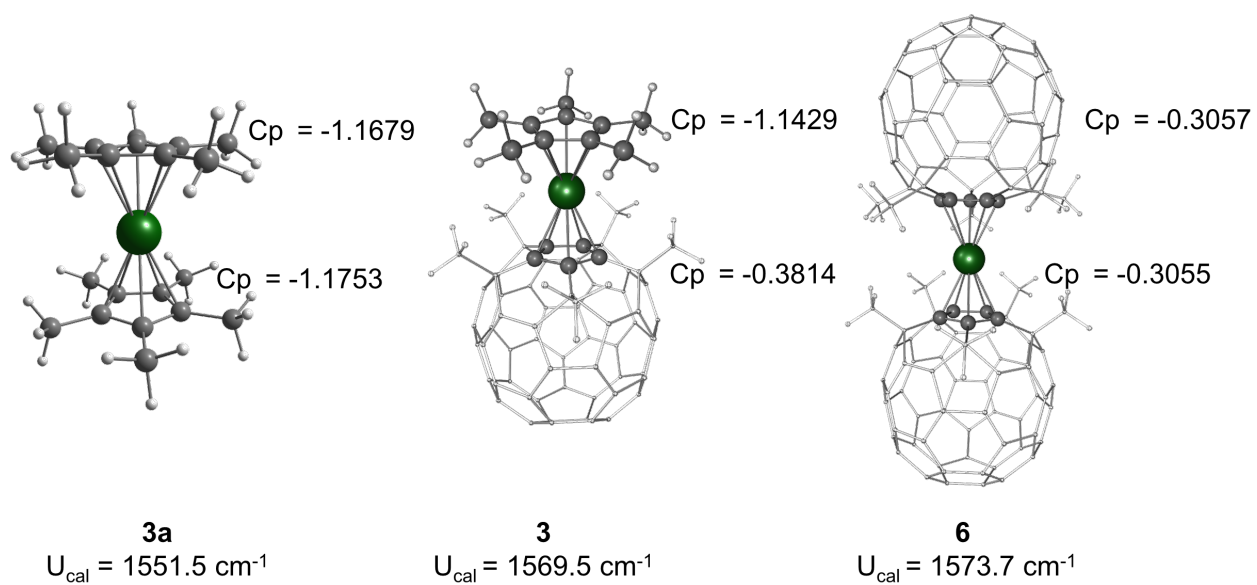

**Figure S2:** Comparison of CASSCF computed Mulliken charges on the five membered rings of **3a**, **3** and **6** with their corresponding  $U_{\text{cal}}$ .

## SUPPORTING INFORMATION

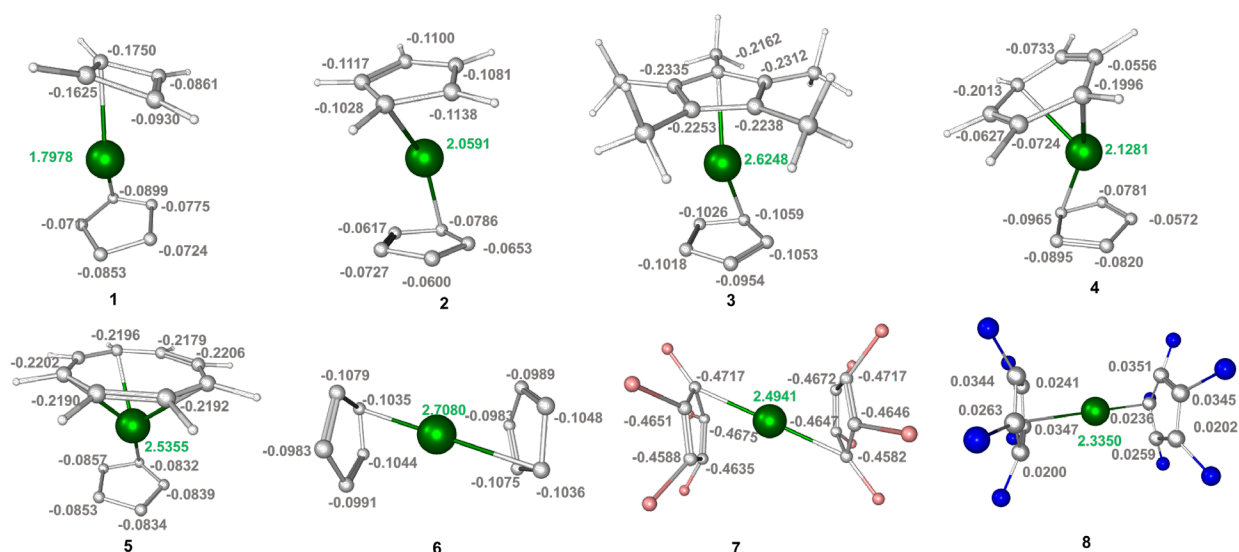

**Figure S3:** CASSCF computed Mulliken charges on the first coordination sphere for complexes **1-8**. Colour code: green (Dy), blue (N), pink (B), grey (C), white (H).

### Thermodynamic Analysis

The gas phase energies, enthalpies, and free energies for the formation of complexes **1-8** are computed at the PBE0 level of theory. Here, we have extracted the thermodynamic parameters by performing the single-point energy calculations at the PBE0 level of theory on the DFT-optimized geometry of complexes **1-8**, while the thermal energy and entropy corrections were taken from the BP86 level of theory (see Computational Methodology).

**Table S3:** PBE0-D3(BJ)/DKH-def2-TZVP computed gas phase formation energies ( $\Delta E$ ), enthalpies ( $\Delta H$ ), and free energies ( $\Delta G$ ) for complexes **1-8** at 298.15 K.

| Complexes                                                                                                                                                                                                     | $\Delta E$<br>kcal/mol | $\Delta H$<br>kcal/mol | $\Delta G$<br>kcal/mol |
|---------------------------------------------------------------------------------------------------------------------------------------------------------------------------------------------------------------|------------------------|------------------------|------------------------|
| <b>1</b> Dy(III)+ {C <sub>55</sub> X <sub>5</sub> } <sup>-</sup> + C <sub>4</sub> H <sub>4</sub> <sup>2+</sup> → [Dy( $\eta^5$ -C <sub>55</sub> X <sub>5</sub> ) ( $\eta^4$ -C <sub>4</sub> H <sub>4</sub> )] | -1346.6                | -1347.8                | -1339.1                |
| <b>2</b> Dy(III)+ {C <sub>55</sub> X <sub>5</sub> } <sup>-</sup> + Cp <sup>-</sup> → [Dy( $\eta^5$ -C <sub>55</sub> X <sub>5</sub> ) ( $\eta^5$ -Cp)] <sup>+</sup>                                            | -1167.4                | -1168.6                | -1158.9                |
| <b>3</b> Dy(III)+{C <sub>55</sub> X <sub>5</sub> } <sup>-</sup> + Cp* <sup>-</sup> → [Dy( $\eta^5$ -C <sub>55</sub> X <sub>5</sub> ) ( $\eta^5$ -Cp*)] <sup>+</sup>                                           | -1174.4                | -1175.6                | -1164.4                |
| <b>4</b> Dy(III)+{C <sub>55</sub> X <sub>5</sub> } <sup>-</sup> + C <sub>6</sub> H <sub>6</sub> → [Dy( $\eta^5$ -C <sub>55</sub> X <sub>5</sub> ) ( $\eta^6$ -C <sub>6</sub> H <sub>6</sub> )] <sup>2+</sup>  | -874.8                 | -876.0                 | -867.3                 |
| <b>5</b> Dy(III)+{C <sub>55</sub> X <sub>5</sub> } <sup>-</sup> + C <sub>8</sub> H <sub>8</sub> <sup>2+</sup> → [Dy( $\eta^5$ -C <sub>55</sub> X <sub>5</sub> ) ( $\eta^8$ -C <sub>8</sub> H <sub>8</sub> )]  | -1427.1                | -1428.2                | -1416.5                |
| <b>6</b> Dy(III)+ 2 {C <sub>55</sub> X <sub>5</sub> } <sup>-</sup> → [Dy( $\eta^5$ -C <sub>55</sub> X <sub>5</sub> ) <sub>2</sub> ] <sup>+</sup>                                                              | -1122.9                | -1124.1                | -1111.1                |
| <b>7</b> Dy(III)+ 2 {C <sub>55</sub> B <sub>5</sub> } <sup>-</sup> → [Dy( $\eta^5$ -C <sub>55</sub> B <sub>5</sub> ) <sub>2</sub> ] <sup>+</sup>                                                              | -1067.6                | -1068.8                | -1057.9                |
| <b>8</b> Dy(III)+ 2 {C <sub>55</sub> N <sub>5</sub> } <sup>-</sup> → [Dy( $\eta^5$ -C <sub>55</sub> N <sub>5</sub> ) <sub>2</sub> ] <sup>+</sup>                                                              | -1056.0                | -1057.2                | -1045.3                |

$\Delta E/\Delta H/\Delta G/ = E/H/G_{\text{complex}} - E/H/G_{\text{Dy(III)}} - E/H/G_{(\eta^5\text{-C}_{55}\text{X}_5)^{-}} - E/H/G_{(\text{CmHm})}$

## SUPPORTING INFORMATION

**Table S4:** BP86-D3(BJ)/DKH-def2-TZVP computed gas phase formation energies( $\Delta E$ ), enthalpies( $\Delta H$ ), and free energies ( $\Delta G$ ) for complexes **1-8** at 298.15 K.

| Complexes                                                                                                                                                                                                      | $\Delta E$<br>kcal/mol | $\Delta H$<br>kcal/mol | $\Delta G$<br>kcal/mol |
|----------------------------------------------------------------------------------------------------------------------------------------------------------------------------------------------------------------|------------------------|------------------------|------------------------|
| <b>1</b> Dy (III)+ {C <sub>55</sub> X <sub>5</sub> } <sup>-</sup> + C <sub>4</sub> H <sub>4</sub> <sup>2+</sup> → [Dy( $\eta^5$ -C <sub>55</sub> X <sub>5</sub> ) ( $\eta^4$ -C <sub>4</sub> H <sub>4</sub> )] | -1181.1                | -1182.2                | -1173.5                |
| <b>2</b> Dy (III)+ {C <sub>55</sub> X <sub>5</sub> } <sup>-</sup> + Cp <sup>-</sup> → [Dy( $\eta^5$ -C <sub>55</sub> X <sub>5</sub> ) ( $\eta^5$ -Cp)] <sup>+</sup>                                            | -919.7                 | -920.9                 | -911.2                 |
| <b>3</b> Dy (III)+{C <sub>55</sub> X <sub>5</sub> } <sup>-</sup> + Cp* <sup>-</sup> → [Dy( $\eta^5$ -C <sub>55</sub> X <sub>5</sub> ) ( $\eta^5$ -Cp*)] <sup>+</sup>                                           | -927.6                 | -928.8                 | -917.5                 |
| <b>4</b> Dy (III)+{C <sub>55</sub> X <sub>5</sub> } <sup>-</sup> + C <sub>6</sub> H <sub>6</sub> → [Dy( $\eta^5$ -C <sub>55</sub> X <sub>5</sub> ) ( $\eta^6$ -C <sub>6</sub> H <sub>6</sub> )] <sup>2+</sup>  | -684.8                 | -686.0                 | -677.3                 |
| <b>5</b> Dy (III)+{C <sub>55</sub> X <sub>5</sub> } <sup>-</sup> + C <sub>8</sub> H <sub>8</sub> <sup>2+</sup> → [Dy( $\eta^5$ -C <sub>55</sub> X <sub>5</sub> ) ( $\eta^8$ -C <sub>8</sub> H <sub>8</sub> )]  | -1174.3                | -1175.5                | -1163.8                |
| <b>6</b> Dy (III)+ 2 {C <sub>55</sub> X <sub>5</sub> } <sup>-</sup> → [Dy( $\eta^5$ -C <sub>55</sub> X <sub>5</sub> ) <sub>2</sub> ] <sup>+</sup>                                                              | -888.6                 | -889.8                 | -876.7                 |
| <b>7</b> Dy (III)+ 2 {C <sub>55</sub> B <sub>5</sub> } <sup>-</sup> → [Dy( $\eta^5$ -C <sub>55</sub> B <sub>5</sub> ) <sub>2</sub> ] <sup>+</sup>                                                              | -825.1                 | -826.3                 | -815.4                 |
| <b>8</b> Dy (III)+ 2 {C <sub>55</sub> N <sub>5</sub> } <sup>-</sup> → [Dy( $\eta^5$ -C <sub>55</sub> N <sub>5</sub> ) <sub>2</sub> ] <sup>+</sup>                                                              | -810.5                 | -811.7                 | -799.8                 |

$$\Delta E/\Delta H/\Delta G/ = E/H/G_{\text{complex}} - E/H/G_{\text{Dy(III)}} - E/H/G_{(\eta^5\text{-C}_{55}\text{X}_5)^{-}} - E/H/G_{(\text{C}_m\text{H}_m)}$$

**Table S5:** Contribution (%) of decomposition energies to Total Binding Energy for complexes **1-8**.

| Complexes | Covalency (%) | $E_{\text{Pauli}}$ (%) | $E_{\text{elstat}}$ (%) | $E_{\text{orb}}$ (%) | $E_{\text{disp}}$ (%) |
|-----------|---------------|------------------------|-------------------------|----------------------|-----------------------|
| <b>1</b>  | 49.7          | 15.7                   | -57.9                   | -57.2                | -0.6                  |
| <b>2</b>  | 50.5          | 20.2                   | -59.1                   | -60.4                | -0.7                  |
| <b>3</b>  | 51.9          | 21.6                   | -58.0                   | -62.7                | -0.9                  |
| <b>4</b>  | 63.3          | 27.3                   | -46.4                   | -80.0                | -0.9                  |
| <b>5</b>  | 50.2          | 20.0                   | -59.5                   | -59.9                | -0.6                  |
| <b>6</b>  | 54.9          | 19.4                   | -53.3                   | -64.9                | -1.1                  |
| <b>7</b>  | 59.9          | 20.0                   | -47.9                   | -71.5                | -0.5                  |
| <b>8</b>  | 61.0          | 17.7                   | -45.6                   | -71.3                | -0.8                  |

**Table S6:** PBE0 computed NPA charges on the coordinated C<sub>m</sub>H<sub>m</sub>, five-membered ring and subsequent neighbour atoms in complexes **1-8**.

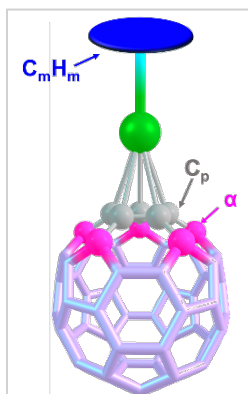

| Complex  | Cp { $\eta^5$ -C <sub>55</sub> X <sub>5</sub> } <sup>-</sup> | $\alpha$ -C/B/N | C <sub>m</sub> H <sub>m</sub> |
|----------|--------------------------------------------------------------|-----------------|-------------------------------|
| <b>1</b> | -0.4276                                                      | -0.1188         | -1.1127                       |
| <b>2</b> | -0.4239                                                      | -0.1275         | -0.9934                       |
| <b>3</b> | -0.4470                                                      | -0.1221         | -0.4378                       |
| <b>4</b> | -0.4099                                                      | -0.1272         | -0.7377                       |
| <b>5</b> | -0.3651                                                      | -0.1075         | -1.5749                       |
| <b>6</b> | -0.4532                                                      | -0.1271         | -0.4533                       |
| <b>7</b> | -1.1785                                                      | 2.0986          | -1.1785                       |
| <b>8</b> | 0.0174                                                       | -1.0695         | 0.0174                        |



## SUPPORTING INFORMATION

**Table S7:** ETS-NOCV derived first four strongest electron deformation densities ( $\Delta E_{\text{orb}(1)}$  to  $\Delta E_{\text{orb}(4)}$ ) at the PBE0-D3(BJ)/TZP level. Isosurface values are 0.0001 au. The direction of the charge flow of the deformation densities is from red to blue. The  $\Delta E_{\text{orb}}$  energies are in kcal/mol. The eigenvalues  $v_i$  give the size of the charge migration.

| Complex | $\Delta E_{\text{orb}(1)}$                                                                                                                                          | $\Delta E_{\text{orb}(2)}$                                                                                                                                           | $\Delta E_{\text{orb}(3)}$                                                                                                                                           | $\Delta E_{\text{orb}(4)}$                                                                                                                                            |
|---------|---------------------------------------------------------------------------------------------------------------------------------------------------------------------|----------------------------------------------------------------------------------------------------------------------------------------------------------------------|----------------------------------------------------------------------------------------------------------------------------------------------------------------------|-----------------------------------------------------------------------------------------------------------------------------------------------------------------------|
| 1       | 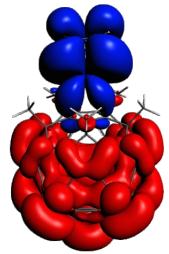<br>$\Delta\rho_{(1)}$<br>$\Delta E_{\text{orb}(1)} = -138.8$ ;<br>$ v_1  = 0.9$   | <br>$\Delta\rho_{(2)}$<br>$\Delta E_{\text{orb}(2)} = -177.0$ ;<br>$ v_2  = 0.4$    | <br>$\Delta\rho_{(3)}$<br>$\Delta E_{\text{orb}(3)} = -171.4$ ;<br>$ v_3  = 0.34$  | <br>$\Delta\rho_{(4)}$<br>$\Delta E_{\text{orb}(4)} = -10.3$ ;<br>$ v_4  = 0.31$   |
| 2       | <br>$\Delta\rho_{(1)}$<br>$\Delta E_{\text{orb}(1)} = 208.9$ ;<br>$ v_1  = 0.48$  | <br>$\Delta\rho_{(2)}$<br>$\Delta E_{\text{orb}(2)} = -195.4$<br>$ v_2  = 0.38$    | <br>$\Delta\rho_{(3)}$<br>$\Delta E_{\text{orb}(3)} = -47.1$ ;<br>$ v_3  = 0.36$  | <br>$\Delta\rho_{(4)}$<br>$\Delta E_{\text{orb}(4)} = -13.7$ ;<br>$ v_4  = 0.34$  |
| 3       | <br>$\Delta\rho_{(1)}$<br>$\Delta E_{\text{orb}(1)} = -203.0$ ;<br>$ v_1  = 0.5$ | <br>$\Delta\rho_{(2)}$<br>$\Delta E_{\text{orb}(2)} = -186.8$ ;<br>$ v_2  = 0.39$ | <br>$\Delta\rho_{(3)}$<br>$\Delta E_{\text{orb}(3)} = -56.7$ ;<br>$ v_3  = 0.37$ | <br>$\Delta\rho_{(4)}$<br>$\Delta E_{\text{orb}(4)} = -10.3$ ;<br>$ v_4  = 0.37$ |
| 4       | <br>$\Delta\rho_{(1)}$                                                           | <br>$\Delta\rho_{(2)}$                                                            | <br>$\Delta\rho_{(3)}$                                                           | <br>$\Delta\rho_{(4)}$                                                           |

## SUPPORTING INFORMATION

|   |                                                                                                                                                                  |                                                                                                                                                                  |                                                                                                                                                                  |                                                                                                                                                                   |
|---|------------------------------------------------------------------------------------------------------------------------------------------------------------------|------------------------------------------------------------------------------------------------------------------------------------------------------------------|------------------------------------------------------------------------------------------------------------------------------------------------------------------|-------------------------------------------------------------------------------------------------------------------------------------------------------------------|
|   | $\Delta E_{\text{orb}(1)} = -229.3;$<br>$ v_1  = 0.37$                                                                                                           | $\Delta E_{\text{orb}(2)} = -226.7;$<br>$ v_2  = 0.36$                                                                                                           | $\Delta E_{\text{orb}(3)} = -5.6;$<br>$ v_3  = 0.31$                                                                                                             | $\Delta E_{\text{orb}(4)} = -1.0;$<br>$ v_4  = 0.30$                                                                                                              |
| 5 | 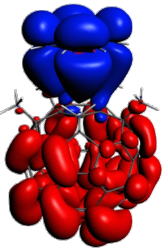<br>$\Delta\rho(1)$<br>$\Delta E_{\text{orb}(1)} = -111.6;$<br>$ v_1  = 0.77$   | <br>$\Delta\rho(2)$<br>$\Delta E_{\text{orb}(2)} = -172.7;$<br>$ v_2  = 0.38$   | <br>$\Delta\rho(3)$<br>$\Delta E_{\text{orb}(3)} = -174.6;$<br>$ v_3  = 0.33$  | <br>$\Delta\rho(4)$<br>$\Delta E_{\text{orb}(4)} = -0.73;$<br>$ v_4  = 0.32$   |
| 6 | <br>$\Delta\rho(1)$<br>$\Delta E_{\text{orb}(1)} = -188.4;$<br>$ v_1  = 0.39$   | <br>$\Delta\rho(2)$<br>$\Delta E_{\text{orb}(2)} = -189.7;$<br>$ v_2  = 0.35$   | <br>$\Delta\rho(3)$<br>$\Delta E_{\text{orb}(3)} = -41.5;$<br>$ v_3  = 0.35$   | <br>$\Delta\rho(4)$<br>$\Delta E_{\text{orb}(4)} = -40.9;$<br>$ v_4  = 0.35$   |
| 7 | <br>$\Delta\rho(1)$<br>$\Delta E_{\text{orb}(1)} = -197.4;$<br>$ v_1  = 0.40$   | <br>$\Delta\rho(2)$<br>$\Delta E_{\text{orb}(2)} = -197.8;$<br>$ v_2  = 0.39$   | <br>$\Delta\rho(3)$<br>$\Delta E_{\text{orb}(3)} = -48.9;$<br>$ v_3  = 0.39$   | <br>$\Delta\rho(4)$<br>$\Delta E_{\text{orb}(4)} = -48.8;$<br>$ v_4  = 0.39$   |
| 8 | <br>$\Delta\rho(1)$<br>$\Delta E_{\text{orb}(1)} = -185.9;$<br>$ v_1  = 0.48$ | <br>$\Delta\rho(2)$<br>$\Delta E_{\text{orb}(1)} = -241.6;$<br>$ v_2  = 0.40$ | <br>$\Delta\rho(3)$<br>$\Delta E_{\text{orb}(3)} = -49.4;$<br>$ v_3  = 0.39$ | <br>$\Delta\rho(4)$<br>$\Delta E_{\text{orb}(4)} = -13.2;$<br>$ v_4  = 0.39$ |

**Table S8:** Natural Population Analysis of Dy(III) ion complex **1-8** along with the Dy(III) free ion.

| Complex | Dy(III) {free}           | Dy(III) {complex}                                            |
|---------|--------------------------|--------------------------------------------------------------|
| 1       |                          | [core]6s( 0.02)4f( 2.10)5d( 0.30)6p( 0.01)7s( 0.01)6d( 0.02) |
| 2       |                          | [core]6s( 0.02)4f( 2.05)5d( 0.26)6p( 0.01)7s( 0.01)6d( 0.03) |
| 3       |                          | [core]6s( 0.02)4f( 2.07)5d( 0.19)6p( 0.01)7s( 0.01)6d( 0.07) |
| 4       | [core]4f( 1.99)5f( 0.01) | [core]6s( 0.02)4f( 2.03)5d( 0.22)6p( 0.01)7s( 0.01)6d( 0.03) |
| 5       |                          | [core]6s( 0.03)4f( 2.03)5d( 0.52)6p( 0.02)7s( 0.01)6d( 0.02) |
| 6       |                          | [core]6s( 0.02)4f( 2.07)5d( 0.18)6p( 0.01)7s( 0.01)6d( 0.08) |
| 7       |                          | [core]6s( 0.02)4f( 2.07)5d( 0.24)6p( 0.01)7s( 0.01)6d( 0.02) |
| 8       |                          | [core]6s( 0.02)4f( 2.14)5d( 0.26)6p( 0.01)7s( 0.01)6d( 0.03) |

## SUPPORTING INFORMATION

**Table S9:** Topological parameters obtained through QTAIM analysis for the Dy-C<sub>ligand</sub> bonds in complexes **1-8**. <sup>a</sup>The electron density at the bond critical density (BCP), <sup>b</sup>The Laplacian of the electron density at the BCP, <sup>c</sup>The Virial Field function, <sup>d</sup>The electronic kinetic energy density, <sup>e</sup>Ratio of Virial field function to Electronic kinetic energy, <sup>f</sup>The total energy density at the BCP.

| Complex  | $\rho(r)^a$ | $\nabla^2\rho(r)^b$ | $ V(r) ^c$ | $G(r)^d$ | $-(G(r)/V(r))^e$ | $H(r)^f$ |
|----------|-------------|---------------------|------------|----------|------------------|----------|
| <b>1</b> | 0.0382      | 0.1270              | 0.0355     | 0.0336   | 0.9465           | -0.0019  |
|          | 0.0408      | 0.1190              | 0.0377     | 0.0337   | 0.8939           | -0.0040  |
|          | 0.0392      | 0.1164              | 0.0356     | 0.0324   | 0.9101           | -0.0033  |
|          | 0.0384      | 0.1182              | 0.0349     | 0.0322   | 0.9226           | -0.0027  |
|          | 0.0394      | 0.1207              | 0.0362     | 0.0332   | 0.9171           | -0.0030  |
|          | 0.0435      | 0.1040              | 0.0396     | 0.0328   | 0.8283           | -0.0068  |
|          | 0.0465      | 0.1036              | 0.0431     | 0.0345   | 0.8005           | -0.0086  |
|          | 0.0419      | 0.1040              | 0.0377     | 0.0319   | 0.8462           | -0.0059  |
| 0.0486   | 0.1026      | 0.0458              | 0.0357     | 0.7795   | -0.0101          |          |
| <b>2</b> | 0.0442      | 0.1206              | 0.0418     | 0.0360   | 0.8612           | -0.0058  |
|          | 0.0421      | 0.1135              | 0.0387     | 0.0335   | 0.8656           | -0.0052  |
|          | 0.0452      | 0.1222              | 0.0431     | 0.0368   | 0.8538           | -0.0063  |
|          | 0.0425      | 0.1160              | 0.0393     | 0.0342   | 0.8702           | -0.0052  |
|          | 0.0427      | 0.1162              | 0.0397     | 0.0344   | 0.8665           | -0.0053  |
|          | 0.0436      | 0.1175              | 0.0409     | 0.0351   | 0.8582           | -0.0057  |
|          | 0.0417      | 0.1161              | 0.0385     | 0.0338   | 0.8779           | -0.0047  |
|          | 0.0417      | 0.1163              | 0.0385     | 0.0338   | 0.8779           | -0.0047  |
| 0.0428   | 0.1196      | 0.0401              | 0.0350     | 0.8728   | -0.0051          |          |
| <b>3</b> | 0.0445      | 0.1293              | 0.0428     | 0.0376   | 0.8785           | -0.0053  |
|          | 0.0450      | 0.1299              | 0.0435     | 0.0380   | 0.8736           | -0.0055  |
|          | 0.0496      | 0.1324              | 0.0495     | 0.0413   | 0.8343           | -0.0082  |
|          | 0.0478      | 0.1301              | 0.0470     | 0.0398   | 0.8468           | -0.0072  |
|          | 0.0479      | 0.1286              | 0.0470     | 0.0396   | 0.8426           | -0.0074  |
| <b>4</b> | 0.0436      | 0.1211              | 0.0412     | 0.0357   | 0.8665           | -0.0054  |
|          | 0.0403      | 0.1141              | 0.0367     | 0.0326   | 0.8883           | -0.0041  |
|          | 0.0434      | 0.1240              | 0.0411     | 0.0361   | 0.8783           | -0.0051  |
|          | 0.0414      | 0.1192              | 0.0384     | 0.0341   | 0.8880           | -0.0043  |
|          | 0.0413      | 0.1088              | 0.0374     | 0.0323   | 0.8636           | -0.0051  |
|          | 0.0407      | 0.1075              | 0.0366     | 0.0318   | 0.8689           | -0.0049  |
|          | 0.0436      | 0.1211              | 0.0412     | 0.0357   | 0.8665           | -0.0054  |
|          | 0.0403      | 0.1141              | 0.0367     | 0.0326   | 0.8883           | -0.0041  |
| <b>5</b> | 0.0375      | 0.1149              | 0.0337     | 0.0312   | 0.9258           | -0.0025  |
|          | 0.0372      | 0.1145              | 0.0333     | 0.0310   | 0.9309           | -0.0024  |
|          | 0.0374      | 0.1143              | 0.0335     | 0.0310   | 0.9254           | -0.0025  |
|          | 0.0374      | 0.1150              | 0.0336     | 0.0312   | 0.9286           | -0.0024  |
|          | 0.0371      | 0.1141              | 0.0333     | 0.0309   | 0.9279           | -0.0024  |
|          | 0.0444      | 0.1417              | 0.0438     | 0.0396   | 0.9041           | -0.0042  |
|          | 0.0453      | 0.1389              | 0.0446     | 0.0397   | 0.8901           | -0.0050  |
|          | 0.0444      | 0.1421              | 0.0438     | 0.0397   | 0.9064           | -0.0042  |
|          | 0.0450      | 0.1388              | 0.0442     | 0.0395   | 0.8937           | -0.0047  |
|          | 0.0449      | 0.1391              | 0.0442     | 0.0395   | 0.8937           | -0.0047  |
|          | 0.0450      | 0.1402              | 0.0444     | 0.0397   | 0.8941           | -0.0047  |
|          | 0.0447      | 0.1411              | 0.0441     | 0.0397   | 0.9002           | -0.0044  |
|          | 0.0453      | 0.1386              | 0.0446     | 0.0396   | 0.8879           | -0.0050  |
| <b>6</b> | 0.0391      | 0.1054              | 0.0347     | 0.0305   | 0.8790           | -0.0042  |
|          | 0.0405      | 0.1083              | 0.0364     | 0.0317   | 0.8709           | -0.0047  |
|          | 0.0379      | 0.0997              | 0.0328     | 0.0289   | 0.8811           | -0.0040  |
|          | 0.0405      | 0.1038              | 0.0361     | 0.0310   | 0.8587           | -0.0050  |
|          | 0.0403      | 0.1080              | 0.0362     | 0.0316   | 0.8729           | -0.0046  |
|          | 0.0392      | 0.1054              | 0.0348     | 0.0306   | 0.8793           | -0.0042  |
|          | 0.0403      | 0.1034              | 0.0358     | 0.0308   | 0.8603           | -0.0050  |
|          | 0.0381      | 0.1002              | 0.0331     | 0.0291   | 0.8792           | -0.0040  |
|          | 0.0376      | 0.1065              | 0.0331     | 0.0298   | 0.9003           | -0.0032  |
|          | <b>7</b>    | 0.0396              | 0.1177     | 0.0362   | 0.0328           | 0.9061   |
| 0.0392   |             | 0.1179              | 0.0358     | 0.0326   | 0.9106           | -0.0032  |
| 0.0410   |             | 0.1216              | 0.0381     | 0.0342   | 0.8976           | -0.0039  |
| 0.0412   |             | 0.1220              | 0.0383     | 0.0344   | 0.8982           | -0.0039  |
| 0.0418   |             | 0.1253              | 0.0393     | 0.0353   | 0.8982           | -0.0040  |
| 0.0416   |             | 0.1250              | 0.0391     | 0.0352   | 0.9003           | -0.0039  |
| 0.0410   |             | 0.1216              | 0.0381     | 0.0343   | 0.9003           | -0.0039  |
| 0.0410   |             | 0.1215              | 0.0381     | 0.0342   | 0.8976           | -0.0039  |

## SUPPORTING INFORMATION

|          |        |        |        |        |        |         |
|----------|--------|--------|--------|--------|--------|---------|
|          | 0.0392 | 0.1179 | 0.0358 | 0.0326 | 0.9106 | -0.0032 |
|          | 0.0398 | 0.1179 | 0.0364 | 0.0329 | 0.9038 | -0.0035 |
| <b>8</b> | 0.0373 | 0.0940 | 0.0317 | 0.0276 | 0.8707 | -0.0041 |
|          | 0.0384 | 0.0943 | 0.0329 | 0.0282 | 0.8571 | -0.0047 |
|          | 0.0356 | 0.0898 | 0.0296 | 0.0260 | 0.8784 | -0.0036 |
|          | 0.0355 | 0.0901 | 0.0296 | 0.0260 | 0.8784 | -0.0035 |
|          | 0.0372 | 0.0941 | 0.0317 | 0.0276 | 0.8707 | -0.0041 |
|          | 0.0356 | 0.0896 | 0.0296 | 0.0260 | 0.8784 | -0.0036 |
|          | 0.0371 | 0.0937 | 0.0315 | 0.0275 | 0.8730 | -0.0040 |
|          | 0.0356 | 0.0902 | 0.0297 | 0.0261 | 0.8788 | -0.0036 |
|          | 0.0382 | 0.0940 | 0.0327 | 0.0281 | 0.8593 | -0.0046 |
|          | 0.0373 | 0.0939 | 0.0317 | 0.0276 | 0.8707 | -0.0041 |

## SUPPORTING INFORMATION

**Table S10:** CASSCF computed spin-free and SOC states and corresponding g-tensor values for the low-lying eight KDs for complexes **1** and **2**. All the energies are reported in  $\text{cm}^{-1}$ .

|                | <b>1</b>         |                                      |          |          |          |                | <b>2</b>         |                                      |          |          |          |                |
|----------------|------------------|--------------------------------------|----------|----------|----------|----------------|------------------|--------------------------------------|----------|----------|----------|----------------|
|                | Spin-free states | SOC states ( ${}^6\text{H}_{15/2}$ ) | g-values |          |          |                | Spin-free states | SOC states ( ${}^6\text{H}_{15/2}$ ) | g-values |          |          |                |
|                |                  |                                      | $g_{xx}$ | $g_{yy}$ | $g_{zz}$ | $\Theta^\circ$ |                  |                                      | $g_{xx}$ | $g_{yy}$ | $g_{zz}$ | $\Theta^\circ$ |
| ${}^6\text{H}$ | 0                | 0.0                                  | 0.000    | 0.000    | 19.980   | 0.0            | 0.0              | 0.0                                  | 0.000    | 0.000    | 19.944   | 0.0            |
|                | 0.0              | 487.4                                | 0.000    | 0.000    | 17.014   | 4.0            | 0.2              | 409.6                                | 0.000    | 0.000    | 17.047   | 0.3            |
|                | 808.7            | 785.0                                | 0.009    | 0.010    | 14.326   | 6.2            | 679.6            | 689.2                                | 0.004    | 0.005    | 14.392   | 0.8            |
|                | 812.5            | 999.4                                | 0.096    | 0.105    | 11.598   | 1.9            | 679.7            | 889.1                                | 0.001    | 0.007    | 11.718   | 1.4            |
|                | 1005.9           | 1198.5                               | 0.469    | 0.635    | 8.988    | 4.6            | 921.7            | 1062.4                               | 0.035    | 0.037    | 9.043    | 2.1            |
|                | 1019             | 1385.7                               | 1.341    | 2.304    | 6.342    | 11.8           | 922.1            | 1208.9                               | 0.969    | 1.336    | 6.263    | 3.4            |
|                | 1319.7           | 1538.6                               | 3.227    | 4.480    | 7.803    | 94.3           | 1170.6           | 1305.0                               | 8.519    | 8.157    | 2.690    | 0.6            |
|                | 1343.4           | 1649.2                               | 0.863    | 4.151    | 16.490   | 90.4           | 1178.3           | 1423.5                               | 0.297    | 0.954    | 17.841   | 90.0           |
|                | 1602.2           |                                      |          |          |          |                | 1311.2           |                                      |          |          |          |                |
|                | 1649.6           |                                      |          |          |          |                | 1464.9           |                                      |          |          |          |                |
| 1728.3         |                  |                                      |          |          |          | 1477.7         |                  |                                      |          |          |          |                |
| ${}^6\text{F}$ | 8208.8           |                                      |          |          |          |                | 8093.7           |                                      |          |          |          |                |
|                | 8290.6           |                                      |          |          |          |                | 8182.9           |                                      |          |          |          |                |
|                | 8395.4           |                                      |          |          |          |                | 8193.9           |                                      |          |          |          |                |
|                | 8431.3           |                                      |          |          |          |                | 8285.3           |                                      |          |          |          |                |
|                | 8441.2           |                                      |          |          |          |                | 8300.8           |                                      |          |          |          |                |
|                | 8653.5           |                                      |          |          |          |                | 8465.3           |                                      |          |          |          |                |
| 8657.2         |                  |                                      |          |          |          | 8465.4         |                  |                                      |          |          |          |                |
| ${}^6\text{P}$ | 34119.0          |                                      |          |          |          |                | 34139.0          |                                      |          |          |          |                |
|                | 35790.9          |                                      |          |          |          |                | 35637.8          |                                      |          |          |          |                |
|                | 35986.0          |                                      |          |          |          |                | 35691.5          |                                      |          |          |          |                |

**Table S11:** CASSCF computed spin-free and SOC states and corresponding g-tensor values for the low-lying eight KDs for complexes **2a** and **3a**. All the energies are reported in  $\text{cm}^{-1}$ .

|                | <b>2a</b>        |                                      |          |          |          |                | <b>3a</b>        |                                      |          |          |          |                |  |
|----------------|------------------|--------------------------------------|----------|----------|----------|----------------|------------------|--------------------------------------|----------|----------|----------|----------------|--|
|                | Spin-free states | SOC states ( ${}^6\text{H}_{15/2}$ ) | g-values |          |          |                | Spin-free states | SOC states ( ${}^6\text{H}_{15/2}$ ) | g-values |          |          |                |  |
|                |                  |                                      | $g_{xx}$ | $g_{yy}$ | $g_{zz}$ | $\Theta^\circ$ |                  |                                      | $g_{xx}$ | $g_{yy}$ | $g_{zz}$ | $\Theta^\circ$ |  |
| ${}^6\text{H}$ | 0.0              | 0.0                                  | 0.000    | 0.000    | 19.890   | 0.0            | 0.0              | 0.0                                  | 0.000    | 0.000    | 19.970   | 0.0            |  |
|                | 0.5              | 310.1                                | 0.000    | 0.000    | 17.098   | 0.0            | 0.2              | 497.6                                | 0.000    | 0.000    | 16.992   | 0.1            |  |
|                | 500.4            | 606.9                                | 0.001    | 0.002    | 14.422   | 0.1            | 846.7            | 825.2                                | 0.003    | 0.004    | 14.334   | 0.2            |  |
|                | 502.1            | 837.3                                | 0.001    | 0.005    | 11.696   | 0.2            | 847.4            | 1050.5                               | 0.008    | 0.014    | 11.674   | 0.2            |  |
|                | 937.6            | 1016.3                               | 0.379    | 0.459    | 9.016    | 0.9            | 1074.3           | 1249.2                               | 0.057    | 0.081    | 9.003    | 0.6            |  |
|                | 941.7            | 1111.2                               | 4.089    | 4.876    | 11.240   | 90.9           | 1077.4           | 1426.0                               | 0.410    | 0.528    | 6.323    | 0.8            |  |
|                | 1106.5           | 1167.4                               | 0.096    | 0.280    | 13.522   | 90.7           | 1378.8           | 1551.5                               | 7.945    | 6.819    | 3.024    | 0.5            |  |
|                | 1133.0           | 1323.4                               | 0.136    | 0.293    | 18.945   | 90.0           | 1385.0           | 1668.5                               | 0.548    | 2.190    | 16.972   | 89.0           |  |
|                | 1149.1           |                                      |          |          |          |                | 1570.1           |                                      |          |          |          |                |  |
|                | 1347.0           |                                      |          |          |          |                | 1709.5           |                                      |          |          |          |                |  |
|                | 1374.2           |                                      |          |          |          |                | 1735.5           |                                      |          |          |          |                |  |
|                | ${}^6\text{F}$   | 8009.8                               |          |          |          |                |                  | 8233.5                               |          |          |          |                |  |
|                |                  | 8039.4                               |          |          |          |                |                  | 8356.8                               |          |          |          |                |  |
|                |                  | 8168.9                               |          |          |          |                |                  | 8381.5                               |          |          |          |                |  |
|                |                  | 8212.6                               |          |          |          |                |                  | 8470.7                               |          |          |          |                |  |
| 8249.9         |                  |                                      |          |          |          |                | 8480.8           |                                      |          |          |          |                |  |
| 8368.0         |                  |                                      |          |          |          |                | 8681.4           |                                      |          |          |          |                |  |
| 8371.4         |                  |                                      |          |          |          | 8682.8         |                  |                                      |          |          |          |                |  |
| ${}^6\text{P}$ | 34117.5          |                                      |          |          |          |                | 34114.3          |                                      |          |          |          |                |  |
|                | 35482.6          |                                      |          |          |          |                | 35904.9          |                                      |          |          |          |                |  |
|                | 35618.2          |                                      |          |          |          |                | 35929.5          |                                      |          |          |          |                |  |

## SUPPORTING INFORMATION

**Table S12:** CASSCF computed spin-free and SOC states and corresponding g-tensor values for the low-lying eight KDs for complexes **3** and **4**. All the energies are reported in  $\text{cm}^{-1}$ .

| 3              |                  |                                      |          |          |          |                | 4                |                                      |          |          |          |                |
|----------------|------------------|--------------------------------------|----------|----------|----------|----------------|------------------|--------------------------------------|----------|----------|----------|----------------|
|                | Spin-free states | SOC states ( ${}^6\text{H}_{15/2}$ ) | g-values |          |          |                | Spin-free states | SOC states ( ${}^6\text{H}_{15/2}$ ) | g-values |          |          |                |
|                |                  |                                      | $g_{xx}$ | $g_{yy}$ | $g_{zz}$ | $\Theta^\circ$ |                  |                                      | $g_{xx}$ | $g_{yy}$ | $g_{zz}$ | $\Theta^\circ$ |
| ${}^6\text{H}$ | 0.0              | 0.0                                  | 0.000    | 0.000    | 19.986   | 0.0            | 0.0              | 0.0                                  | 0.000    | 0.000    | 19.976   | 0.0            |
|                | 0.3              | 541.7                                | 0.000    | 0.000    | 16.963   | 0.6            | 0.1              | 373.2                                | 0.000    | 0.000    | 17.137   | 5.3            |
|                | 940.7            | 845.2                                | 0.005    | 0.006    | 14.370   | 0.9            | 592.1            | 584.1                                | 0.001    | 0.001    | 14.484   | 7.8            |
|                | 941.0            | 1033.6                               | 0.001    | 0.011    | 11.742   | 0.5            | 594.1            | 733.4                                | 0.034    | 0.037    | 11.729   | 4.2            |
|                | 1007.4           | 1215.3                               | 0.056    | 0.067    | 9.025    | 1.5            | 737.4            | 879.0                                | 0.237    | 0.312    | 9.107    | 1.1            |
|                | 1009.7           | 1404.1                               | 0.047    | 0.161    | 6.316    | 1.7            | 744.7            | 1016.5                               | 1.289    | 1.955    | 6.472    | 6.2            |
|                | 1321.6           | 1569.5                               | 2.742    | 3.097    | 3.618    | 10.4           | 960.1            | 1124.8                               | 3.309    | 3.384    | 7.521    | 82.3           |
|                | 1325.6           | 1675.4                               | 13.295   | 7.481    | 1.119    | 0.1            | 983.2            | 1200.5                               | 0.922    | 4.677    | 15.285   | 89.7           |
|                | 1632.9           |                                      |          |          |          |                | 1149.4           |                                      |          |          |          |                |
|                | 1690.5           |                                      |          |          |          |                | 1229.9           |                                      |          |          |          |                |
|                | 1774.1           |                                      |          |          |          |                | 1274.7           |                                      |          |          |          |                |
|                | ${}^6\text{F}$   | 8246.3                               |          |          |          |                |                  | 7945.3                               |          |          |          |                |
|                |                  | 8310.9                               |          |          |          |                |                  | 8029.2                               |          |          |          |                |
| 8460.0         |                  |                                      |          |          |          |                | 8090.4           |                                      |          |          |          |                |
| 8466.8         |                  |                                      |          |          |          |                | 8115.9           |                                      |          |          |          |                |
| 8476.5         |                  |                                      |          |          |          |                | 8137.1           |                                      |          |          |          |                |
| 8690.6         |                  |                                      |          |          |          |                | 8283.6           |                                      |          |          |          |                |
| 8691.7         |                  |                                      |          |          |          |                | 8284.5           |                                      |          |          |          |                |
| ${}^6\text{P}$ | 34151.4          |                                      |          |          |          |                | 34160.9          |                                      |          |          |          |                |
|                | 35916.6          |                                      |          |          |          |                | 35394.2          |                                      |          |          |          |                |
|                | 35939.2          |                                      |          |          |          |                | 35443.9          |                                      |          |          |          |                |

**Table S13:** CASSCF computed spin-free and SOC states and corresponding g-tensor values for the low-lying eight KDs for complexes **5** and **6**. All the energies are reported in  $\text{cm}^{-1}$ .

| 5              |                  |                                      |          |          |          |                | 6                |                                      |          |          |          |                |
|----------------|------------------|--------------------------------------|----------|----------|----------|----------------|------------------|--------------------------------------|----------|----------|----------|----------------|
|                | Spin-free states | SOC states ( ${}^6\text{H}_{15/2}$ ) | g-values |          |          |                | Spin-free states | SOC states ( ${}^6\text{H}_{15/2}$ ) | g-values |          |          |                |
|                |                  |                                      | $g_{xx}$ | $g_{yy}$ | $g_{zz}$ | $\Theta^\circ$ |                  |                                      | $g_{xx}$ | $g_{yy}$ | $g_{zz}$ | $\Theta^\circ$ |
| ${}^6\text{H}$ | 0.0              | 0.0                                  | 0.194    | 0.315    | 9.745    | 0.0            | 0.0              | 0.0                                  | 0.000    | 0.000    | 19.998   | 0.0            |
|                | 1.6              | 14.9                                 | 0.015    | 0.122    | 12.038   | 23.3           | 0.5              | 520.4                                | 0.000    | 0.000    | 16.987   | 1.2            |
|                | 20.3             | 29.8                                 | 0.110    | 0.361    | 6.676    | 20.3           | 871.3            | 778.5                                | 0.009    | 0.009    | 14.439   | 1.8            |
|                | 21.2             | 73.7                                 | 1.680    | 1.940    | 3.861    | 17.7           | 872.1            | 932.0                                | 0.005    | 0.012    | 11.816   | 2.0            |
|                | 138.5            | 97.9                                 | 1.806    | 2.985    | 11.261   | 19.0           | 911.0            | 1096.5                               | 0.006    | 0.013    | 9.058    | 3.3            |
|                | 144.7            | 108.4                                | 4.750    | 6.936    | 9.358    | 99.2           | 911.2            | 1284.8                               | 0.208    | 0.221    | 6.301    | 3.0            |
|                | 211.5            | 272.3                                | 0.000    | 0.000    | 17.424   | 16.7           | 1180.9           | 1461.9                               | 0.857    | 1.298    | 3.660    | 3.2            |
|                | 229.2            | 489.7                                | 0.000    | 0.000    | 19.991   | 17.8           | 1187.9           | 1573.7                               | 11.607   | 9.451    | 1.188    | 0.5            |
|                | 229.5            |                                      |          |          |          |                | 1557.3           |                                      |          |          |          |                |
|                | 539.7            |                                      |          |          |          |                | 1568.4           |                                      |          |          |          |                |
|                | 540.2            |                                      |          |          |          |                | 1693.3           |                                      |          |          |          |                |
|                | ${}^6\text{F}$   | 7419.7                               |          |          |          |                |                  | 8192.3                               |          |          |          |                |
|                |                  | 7420.4                               |          |          |          |                |                  | 8198.9                               |          |          |          |                |
|                |                  | 7460.8                               |          |          |          |                |                  | 8370.8                               |          |          |          |                |
|                |                  | 7461.6                               |          |          |          |                |                  | 8374.4                               |          |          |          |                |
| 7570.3         |                  |                                      |          |          |          |                | 8420.2           |                                      |          |          |          |                |
| 7572.0         |                  |                                      |          |          |          |                | 8604.7           |                                      |          |          |          |                |
| 7717.0         |                  |                                      |          |          |          |                | 8604.7           |                                      |          |          |          |                |
| ${}^6\text{P}$ | 34211.8          |                                      |          |          |          |                | 34185.9          |                                      |          |          |          |                |
|                | 34221.4          |                                      |          |          |          |                | 35824.8          |                                      |          |          |          |                |
|                | 34645.9          |                                      |          |          |          |                | 35848.7          |                                      |          |          |          |                |

## SUPPORTING INFORMATION

**Table S14:** CASSCF computed spin-free and SOC states and corresponding g-tensor values for the low-lying eight KDs for complexes **7** and **8**. All the energies are reported in  $\text{cm}^{-1}$ .

| 7              |                  |                                      |          |          |          |        | 8              |                  |                                      |          |          |          |  |                |
|----------------|------------------|--------------------------------------|----------|----------|----------|--------|----------------|------------------|--------------------------------------|----------|----------|----------|--|----------------|
|                | Spin-free states | SOC states ( ${}^6\text{H}_{15/2}$ ) | g-values |          |          |        | $\Theta^\circ$ | Spin-free states | SOC states ( ${}^6\text{H}_{15/2}$ ) | g-values |          |          |  | $\Theta^\circ$ |
|                |                  |                                      | $g_{xx}$ | $g_{yy}$ | $g_{zz}$ |        |                |                  |                                      | $g_{xx}$ | $g_{yy}$ | $g_{zz}$ |  |                |
| ${}^6\text{H}$ | 0.0              | 0.0                                  | 0.000    | 0.000    | 19.996   | 0.0    | 0.0            | 0.0              | 0.000                                | 0.000    | 19.998   | 0.0      |  |                |
|                | 1.2              | 452.3                                | 0.000    | 0.000    | 17.040   | 1.6    | 0.3            | 457.9            | 0.000                                | 0.000    | 17.041   | 1.6      |  |                |
|                | 707.0            | 650.6                                | 0.033    | 0.034    | 14.500   | 2.8    | 702.5          | 654.8            | 0.008                                | 0.008    | 14.509   | 2.8      |  |                |
|                | 708.7            | 760.6                                | 0.028    | 0.035    | 11.882   | 2.8    | 703.5          | 768.8            | 0.005                                | 0.010    | 11.889   | 2.9      |  |                |
|                | 771.0            | 887.4                                | 0.033    | 0.041    | 9.124    | 3.8    | 781.5          | 906.7            | 0.020                                | 0.024    | 9.109    | 3.8      |  |                |
|                | 771.1            | 1041.3                               | 0.346    | 0.403    | 6.365    | 3.1    | 781.6          | 1076.4           | 0.251                                | 0.287    | 6.334    | 3.1      |  |                |
|                | 938.4            | 1189.9                               | 0.396    | 1.136    | 3.713    | 3.3    | 965.5          | 1241.5           | 0.374                                | 0.910    | 3.686    | 3.2      |  |                |
|                | 948.3            | 1284.1                               | 11.322   | 9.789    | 1.212    | 0.4    | 972.7          | 1347.0           | 11.189                               | 9.907    | 1.201    | 0.5      |  |                |
|                | 1271.6           |                                      |          |          |          |        | 1332.0         |                  |                                      |          |          |          |  |                |
|                | 1278.3           |                                      |          |          |          |        | 1338.9         |                  |                                      |          |          |          |  |                |
| 1397.1         |                  |                                      |          |          |          | 1471.7 |                |                  |                                      |          |          |          |  |                |
| ${}^6\text{F}$ | 8022.5           |                                      |          |          |          |        | 8042.7         |                  |                                      |          |          |          |  |                |
|                | 8026.5           |                                      |          |          |          |        | 8045.4         |                  |                                      |          |          |          |  |                |
|                | 8176.5           |                                      |          |          |          |        | 8195.9         |                  |                                      |          |          |          |  |                |
|                | 8181.4           |                                      |          |          |          |        | 8199.3         |                  |                                      |          |          |          |  |                |
|                | 8222.9           |                                      |          |          |          |        | 8258.8         |                  |                                      |          |          |          |  |                |
|                | 8353.6           |                                      |          |          |          |        | 8400.3         |                  |                                      |          |          |          |  |                |
|                | 8353.8           |                                      |          |          |          |        | 8400.4         |                  |                                      |          |          |          |  |                |
| ${}^6\text{P}$ | 34217.0          |                                      |          |          |          |        | 34207.1        |                  |                                      |          |          |          |  |                |
|                | 35520.8          |                                      |          |          |          |        | 35571.8        |                  |                                      |          |          |          |  |                |
|                | 35535.0          |                                      |          |          |          |        | 35582.3        |                  |                                      |          |          |          |  |                |

**Table S15:** SINGLE\_ANISO computed wave function decomposition analysis of complexes **1-8**.

| $\pm mJ$ | Complex 1                                         | Complex 2                                          |
|----------|---------------------------------------------------|----------------------------------------------------|
| KD1      | 100 % $ \pm 15/2\rangle$                          | 99.6 % $ \pm 15/2\rangle$                          |
| KD2      | 99.2 % $ \pm 13/2\rangle$                         | 99.8 % $ \pm 13/2\rangle$                          |
| KD3      | 95.3 % $ \pm 11/2\rangle$                         | 99.6 % $ \pm 11/2\rangle$                          |
| KD4      | 91.4 % $ \pm 9/2\rangle$                          | 99.5 % $ \pm 9/2\rangle$                           |
| KD5      | 90.8 % $ \pm 7/2\rangle$                          | 99.8 % $ \pm 7/2\rangle$                           |
| KD6      | 91.4 % $ \pm 5/2\rangle$                          | 96.9 % $ \pm 5/2\rangle$                           |
| KD7      | 86.9 % $ \pm 3/2\rangle$ + 8.7% $ \pm 1/2\rangle$ | 79 % $ \pm 3/2\rangle$ + 19.5 % $ \pm 1/2\rangle$  |
| KD8      | 88 % $ \pm 1/2\rangle$ + 10 % $ \pm 3/2\rangle$   | 78.1 % $ \pm 1/2\rangle$ + 20.5% $ \pm 3/2\rangle$ |

  

| $\pm mJ$ | Complex 3                 | Complex 4                                         |
|----------|---------------------------|---------------------------------------------------|
| KD1      | 100 % $ \pm 15/2\rangle$  | 99.8 % $ \pm 15/2\rangle$                         |
| KD2      | 100 % $ \pm 13/2\rangle$  | 98.9 % $ \pm 13/2\rangle$                         |
| KD3      | 99.7 % $ \pm 11/2\rangle$ | 93.5 % $ \pm 11/2\rangle$                         |
| KD4      | 99.6 % $ \pm 9/2\rangle$  | 88.4 % $ \pm 9/2\rangle$ + 6.7% $ \pm 7/2\rangle$ |
| KD5      | 99.6 % $ \pm 7/2\rangle$  | 88 % $ \pm 7/2\rangle$ + 5.6 % $ \pm 5/2\rangle$  |
| KD6      | 99.7 % $ \pm 5/2\rangle$  | 90.2 % $ \pm 5/2\rangle$                          |

## SUPPORTING INFORMATION

|     |                          |                                                    |
|-----|--------------------------|----------------------------------------------------|
| KD7 | 98.9 % $ \pm 3/2\rangle$ | 87.9 % $ \pm 3/2\rangle$ + 7.6 % $ \pm 1/2\rangle$ |
| KD8 | 98.1 % $ \pm 1/2\rangle$ | 91.9 % $ \pm 1/2\rangle$                           |

| $\pm mJ$ | Complex 5                                                                                                 | Complex 6                                            |
|----------|-----------------------------------------------------------------------------------------------------------|------------------------------------------------------|
| KD1      | 38.8 % $ \pm 9/2\rangle$ + 27.1 % $ \pm 5/2\rangle$ + 15.1 % $ \pm 11/2\rangle$                           | 100 % $ \pm 15/2\rangle$                             |
| KD2      | 37.0 % $ \pm 7/2\rangle$ + 30.1 % $ \pm 11/2\rangle$ + 16.9 % $ \pm 5/2\rangle$                           | 98.9 % $ \pm 13/2\rangle$                            |
| KD3      | 33.1 % $ \pm 3/2\rangle$ + 30.4 % $ \pm 7/2\rangle$ + 19.4 % $ \pm 1/2\rangle$                            | 78.5 % $ \pm 11/2\rangle$ + 17.5 % $ \pm 9/2\rangle$ |
| KD4      | 48.7 % $ \pm 1/2\rangle$ + 31 % $ \pm 5/2\rangle$ + 14.6 % $ \pm 7/2\rangle$                              | 77.6 % $ \pm 9/2\rangle$ + 20 % $ \pm 11/2\rangle$   |
| KD5      | 25.1 % $ \pm 9/2\rangle$ + 24.5 % $ \pm 13/2\rangle$ + 13.1 % $ \pm 3/2\rangle$ + 10.7% $ \pm 7/2\rangle$ | 97.8 % $ \pm 7/2\rangle$                             |
| KD6      | 34.9 % $ \pm 3/2\rangle$ + 21.1 % $ \pm 1/2\rangle$ + 16.7 % $ \pm 5/2\rangle$                            | 99.8 % $ \pm 5/2\rangle$                             |
| KD7      | 33.3 % $ \pm 11/2\rangle$ + 30.9 % $ \pm 13/2\rangle$ + 26.7% $ \pm 15/2\rangle$                          | 99.7 % $ \pm 3/2\rangle$                             |
| KD8      | 68.7 % $ \pm 15/2\rangle$ + 26.3 % $ \pm 13/2\rangle$                                                     | 99.7 % $ \pm 1/2\rangle$                             |

| $\pm mJ$ | Complex 7                 | Complex 8                 |
|----------|---------------------------|---------------------------|
| KD1      | 100 % $ \pm 15/2\rangle$  | 100 % $ \pm 15/2\rangle$  |
| KD2      | 99.9 % $ \pm 13/2\rangle$ | 99.9 % $ \pm 13/2\rangle$ |
| KD3      | 99.3 % $ \pm 11/2\rangle$ | 99.3 % $ \pm 11/2\rangle$ |
| KD4      | 99.3 % $ \pm 9/2\rangle$  | 99.3 % $ \pm 9/2\rangle$  |
| KD5      | 99.8 % $ \pm 7/2\rangle$  | 99.9 % $ \pm 7/2\rangle$  |
| KD6      | 99.9 % $ \pm 5/2\rangle$  | 99.9 % $ \pm 5/2\rangle$  |
| KD7      | 99.7 % $ \pm 3/2\rangle$  | 99.7 % $ \pm 3/2\rangle$  |
| KD8      | 99.7 % $ \pm 1/2\rangle$  | 99.8 % $ \pm 1/2\rangle$  |



## SUPPORTING INFORMATION

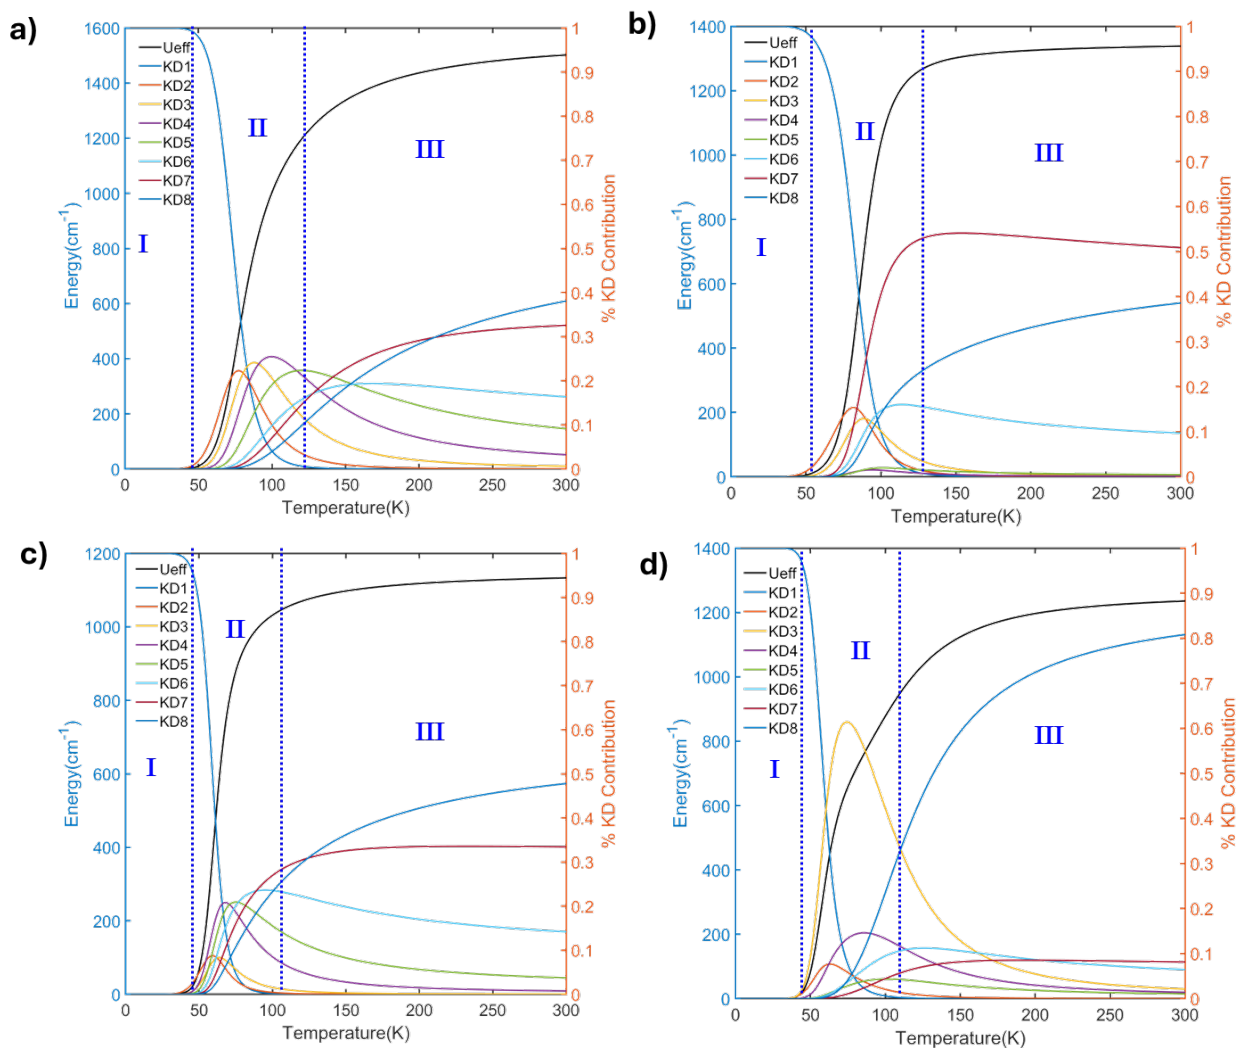

**Figure S4:** Temperature dependence of calculated  $U_{\text{eff}}$  and relative contribution of each Kramer's doublet to the relaxation calculated as  $k_i(T)/N_k$  for complexes 1(a), 2(b), 4(c), 7(d).

## SUPPORTING INFORMATION

**Table S16:** Effective demagnetization barrier ( $U_{\text{eff}}$ ) with the three most contributing KDs to the barrier heights.

| Complexes | $U_{\text{cal}}$ (cm <sup>-1</sup> ) | $U_{\text{eff}}$ (cm <sup>-1</sup> ) | $k_{\text{QTM}}$ | % contribution from KDs    |
|-----------|--------------------------------------|--------------------------------------|------------------|----------------------------|
| 1         | 1538.6                               | 1501                                 | 2.43E-07         | KD8 37% + KD7 32%+ KD6 16% |
| 2         | 1305.0                               | 1338                                 | 1.46E-06         | KD8 38% + KD7 50%+ KD6 39% |
| 3         | 1569.5                               | 1627.5                               | 6.55E-08         | KD8 68% + KD7 26%+ KD6 1%  |
| 4         | 1124.8                               | 1133                                 | 1.71E-07         | KD8 47% + KD7 33%+ KD6 14% |
| 5         | 108.4                                | 95.2                                 | 8.48E-02         | KD6 59% + KD5 19%+ KD4 15% |
| 6         | 1573.7                               | 1533                                 | 3.99E-09         | KD8 81% + KD7 12%+ KD6 4%  |
| 7         | 1284.1                               | 1235                                 | 2.37E-07         | KD8 80% + KD7 8%+ KD6 6%   |
| 8         | 1347.0                               | 1314.0                               | 8.99E-08         | KD8 85% + KD7 7%+ KD6 5%   |
| 3a        | 1551.5                               | 1589.0                               | 6.02E-07         | KD8 38% + KD7 51%+ KD6 6%  |

**Table S17:** SINGLE\_ANISO computed crystal field parameters for **1–8**. The CF parameters were computed using the following equation,  $\widehat{H}_{CF} = \sum_{k=-q}^q B_k^q O_k^q$  and here  $B_k^q$  and  $O_k^q$  are the crystal field parameters and Steven's operator, respectively.

| k | q  | $B_k^q$          |                  |                  |                  |                 |                  |                  |                  |
|---|----|------------------|------------------|------------------|------------------|-----------------|------------------|------------------|------------------|
|   |    | 1                | 2                | 3                | 4                | 5               | 6                | 7                | 8                |
| 2 | -2 | 3.69E+00         | -1.14E-01        | 1.89E-02         | -7.27E-02        | 2.24E-01        | 1.51E-01         | 6.76E-02         | 1.09E-01         |
| 2 | -1 | 2.40E+00         | 7.33E-02         | -3.10E-01        | 3.30E+00         | 1.39E+00        | 1.96E-01         | 2.73E-01         | 7.24E-03         |
| 2 | 0  | <b>-2.10E+01</b> | <b>-1.83E+01</b> | <b>-2.10E+01</b> | <b>-1.53E+01</b> | <b>5.32E+00</b> | <b>-8.51E+00</b> | <b>-1.57E+01</b> | <b>-1.65E+01</b> |
| 2 | 1  | 4.00E+00         | 2.50E-01         | 8.61E-01         | -1.80E+00        | 3.69E+00        | 3.04E-02         | -5.06E-01        | -6.21E-01        |
| 2 | 2  | 3.79E-01         | -1.41E+00        | 2.45E-01         | -8.14E-01        | -2.63E-02       | -1.28E-01        | -2.68E-01        | -1.91E-01        |
| 4 | -4 | -2.11E-02        | -1.90E-03        | -6.55E-04        | 1.44E-02         | 1.61E-05        | -3.03E-04        | -3.04E-03        | -1.49E-03        |
| 4 | -3 | -3.66E-03        | 7.71E-03         | -1.30E-02        | -6.81E-04        | 1.02E-03        | 4.90E-04         | 4.78E-03         | -4.03E-04        |
| 4 | -2 | 1.97E-02         | 4.39E-03         | -1.03E-02        | -1.28E-02        | 6.69E-03        | 1.28E-04         | 1.49E-04         | 1.31E-05         |
| 4 | -1 | -4.16E-03        | 1.44E-03         | -1.72E-03        | -4.17E-02        | 3.79E-02        | 8.73E-04         | 2.44E-03         | 2.82E-04         |
| 4 | 0  | -1.27E-02        | -1.38E-02        | -1.80E-02        | -8.55E-03        | 4.75E-02        | -1.50E-04        | -8.93E-03        | -2.05E-03        |
| 4 | 1  | -1.99E-02        | 1.69E-02         | 4.26E-03         | 2.67E-02         | 1.04E-01        | 1.47E-04         | -4.77E-03        | -7.38E-03        |
| 4 | 2  | -6.68E-03        | 1.25E-02         | 1.56E-02         | -9.61E-03        | 6.94E-03        | -1.24E-04        | -1.11E-03        | 4.23E-04         |
| 4 | 3  | 1.6E-04          | 4.95E-03         | 7.03E-03         | 3.00E-03         | 5.40E-04        | 8.06E-04         | -1.40E-03        | 4.51E-03         |
| 4 | 4  | 1.28E-02         | -3.21E-05        | -3.95E-04        | -7.57E-03        | -4.31E-04       | -5.16E-05        | 2.18E-03         | 3.67E-03         |
| 6 | -6 | -1.01E-04        | 2.60E-05         | 7.10E-05         | 7.89E-05         | 1.87E-04        | 1.62E-06         | -5.47E-05        | -1.48E-05        |
| 6 | -5 | 1.03E-04         | -3.10E-03        | 5.41E-03         | -4.35E-04        | 3.42E-03        | -8.96E-05        | 9.96E-03         | 1.97E-03         |
| 6 | -4 | 1.14E-04         | -5.07E-05        | 2.27E-05         | -3.12E-04        | -1.33E-04       | 1.08E-05         | 2.65E-04         | 5.78E-05         |
| 6 | -3 | -1.26E-04        | -8.12E-04        | 8.65E-04         | -1.26E-04        | 3.43E-05        | -5.39E-06        | -1.20E-04        | 1.91E-05         |
| 6 | -2 | -2.63E-03        | -1.21E-03        | 1.58E-03         | 4.30E-03         | -9.15E-05       | -1.74E-06        | 9.41E-06         | -4.10E-06        |
| 6 | -1 | -1.93E-03        | 1.21E-05         | 1.92E-04         | -2.38E-03        | -6.23E-04       | -4.30E-05        | -4.74E-04        | -2.91E-05        |
| 6 | 0  | -1.26E-03        | -6.86E-04        | -1.70E-03        | -9.76E-04        | -5.18E-04       | -7.00E-05        | -1.80E-03        | -1.94E-03        |

## SUPPORTING INFORMATION

|    |     |           |           |           |           |           |           |           |           |
|----|-----|-----------|-----------|-----------|-----------|-----------|-----------|-----------|-----------|
| 6  | 1   | -2.68E-03 | -2.86E-05 | -2.88E-04 | 1.23E-03  | -2.08E-03 | -6.90E-06 | 9.07E-04  | 1.19E-03  |
| 6  | 2   | -9.32E-04 | -5.98E-03 | -2.50E-03 | 2.33E-03  | -2.57E-04 | 1.91E-06  | 2.21E-05  | -1.91E-05 |
| 6  | 3   | -5.80E-04 | 2.68E-04  | -6.83E-04 | -1.58E-03 | -3.49E-05 | -9.56E-06 | 1.36E-05  | -1.79E-04 |
| 6  | 4   | 1.01E-04  | -6.48E-04 | 1.54E-04  | 5.23E-04  | -1.08E-04 | 1.74E-06  | -1.78E-04 | -1.63E-04 |
| 6  | 5   | -1.37E-03 | 3.50E-03  | -1.85E-03 | -1.55E-03 | 1.89E-03  | 2.72E-04  | -1.02E-03 | -4.80E-03 |
| 6  | 6   | -3.82E-04 | 4.77E-05  | -7.81E-05 | -1.88E-04 | -4.01E-05 | 8.31E-07  | -2.25E-05 | 3.51E-05  |
| 8  | -8  | 6.79E-07  | 2.09E-09  | 3.26E-09  | 1.24E-08  | 3.46E-07  | 3.77E-11  | -8.93E-09 | 4.88E-09  |
| 8  | -7  | 1.34E-06  | -6.69E-07 | -4.54E-07 | 7.13E-07  | -1.01E-06 | 4.71E-09  | 5.35E-07  | 1.77E-07  |
| 8  | -6  | -3.02E-07 | -6.55E-08 | 7.39E-08  | 1.42E-07  | -8.43E-07 | -1.36E-09 | 2.45E-08  | 5.31E-09  |
| 8  | -5  | 7.28E-07  | -2.24E-05 | 4.26E-05  | -4.42E-06 | -1.29E-05 | 2.50E-07  | 5.87E-05  | 1.15E-05  |
| 8  | -4  | -1.26E-06 | -4.85E-07 | -4.22E-08 | -1.76E-07 | 5.68E-07  | -3.22E-08 | 1.08E-06  | 1.28E-07  |
| 8  | -3  | 3.95E-06  | -7.30E-06 | 9.42E-06  | -1.33E-06 | -5.21E-07 | 2.49E-08  | -8.41E-07 | 1.15E-07  |
| 8  | -2  | -2.18E-05 | -1.07E-05 | 1.63E-05  | 2.99E-05  | -4.93E-07 | -5.73E-10 | 1.48E-07  | 1.30E-07  |
| 8  | -1  | -3.47E-06 | 6.96E-08  | 2.67E-07  | -3.12E-06 | -2.31E-07 | 3.11E-08  | -5.64E-07 | -3.91E-08 |
| 8  | 0   | -2.06E-06 | -1.02E-06 | -2.72E-06 | -1.10E-06 | -3.50E-08 | 2.62E-08  | -2.00E-06 | -2.27E-06 |
| 8  | 1   | -4.64E-06 | 1.12E-07  | -2.67E-07 | 1.61E-06  | -5.11E-07 | 5.21E-09  | 1.08E-06  | 1.54E-06  |
| 8  | 2   | -9.99E-06 | -5.31E-05 | -2.54E-05 | 1.53E-05  | -4.65E-07 | -1.31E-09 | -2.55E-07 | -3.74E-07 |
| 8  | 3   | -8.25E-06 | 1.87E-06  | -7.47E-06 | -8.68E-06 | -4.50E-07 | 4.54E-08  | 1.09E-07  | -1.39E-06 |
| 8  | 4   | 1.68E-06  | -4.62E-06 | 1.24E-06  | 2.13E-06  | 5.48E-07  | -5.19E-09 | -7.14E-07 | -4.43E-07 |
| 8  | 5   | -9.41E-06 | 2.54E-05  | -1.47E-05 | -9.23E-06 | -7.37E-06 | -7.58E-07 | -5.99E-06 | -2.80E-05 |
| 8  | 6   | -5.16E-07 | -5.85E-08 | -2.26E-07 | 1.96E-07  | -2.07E-08 | -7.87E-10 | 1.54E-09  | -8.08E-09 |
| 8  | 7   | 7.01E-07  | 8.53E-07  | 4.98E-08  | -5.37E-07 | 8.09E-07  | -1.94E-09 | 6.55E-08  | -1.34E-07 |
| 8  | 8   | 6.84E-08  | 2.22E-08  | 2.16E-08  | -2.56E-08 | -4.08E-07 | 1.63E-10  | -1.74E-08 | -8.21E-09 |
| 10 | -10 | 8.80E-09  | -1.52E-08 | -1.28E-08 | -2.60E-09 | 1.40E-08  | 1.85E-11  | -1.37E-08 | -1.58E-08 |
| 10 | -9  | 2.77E-08  | 1.31E-08  | 1.23E-08  | -1.58E-08 | -3.98E-09 | -5.35E-11 | -1.45E-09 | 8.04E-09  |
| 10 | -8  | -3.05E-08 | 7.62E-09  | 1.02E-08  | 1.68E-08  | 1.03E-08  | 1.18E-12  | -8.78E-10 | 8.03E-10  |
| 10 | -7  | -6.14E-08 | -1.28E-07 | 1.83E-07  | 5.21E-08  | 3.23E-08  | 5.20E-12  | -6.28E-09 | 3.99E-10  |
| 10 | -6  | -1.05E-08 | 2.14E-09  | 6.30E-09  | 2.64E-09  | 2.69E-08  | -1.70E-11 | -1.52E-08 | -4.17E-09 |
| 10 | -5  | 1.48E-08  | -4.66E-08 | 2.61E-07  | -3.82E-08 | 7.92E-08  | 7.96E-11  | 5.11E-07  | 1.10E-07  |
| 10 | -4  | 1.61E-07  | 1.34E-07  | -4.95E-08 | 1.08E-07  | -5.40E-08 | 2.97E-11  | 1.22E-07  | 3.35E-08  |
| 10 | -3  | 2.70E-07  | -1.61E-07 | 1.47E-07  | -6.18E-09 | -1.19E-08 | -5.06E-11 | -1.96E-08 | 5.20E-09  |
| 10 | -2  | 4.06E-08  | 1.57E-08  | -2.28E-08 | -5.60E-08 | -1.22E-08 | -9.82E-12 | -1.15E-09 | 1.75E-10  |
| 10 | -1  | 8.21E-08  | -1.18E-08 | -5.76E-09 | 9.91E-08  | -2.69E-08 | -5.52E-11 | 1.97E-08  | 1.01E-09  |
| 10 | 0   | 1.67E-08  | 2.88E-09  | 3.45E-08  | 7.23E-09  | -6.15E-09 | 1.87E-11  | 3.37E-08  | 3.28E-08  |
| 10 | 1   | 1.28E-07  | -1.40E-09 | 2.82E-09  | -5.48E-08 | -7.86E-08 | -8.72E-12 | -3.75E-08 | -4.49E-08 |
| 10 | 2   | 3.36E-08  | 5.69E-08  | 3.98E-08  | -3.65E-08 | -1.72E-08 | 9.75E-12  | 1.13E-09  | 2.89E-10  |
| 10 | 3   | -1.03E-07 | 1.47E-08  | -1.43E-07 | 4.51E-07  | -6.57E-09 | -9.90E-11 | -3.07E-09 | -3.75E-08 |
| 10 | 4   | -3.98E-08 | 2.77E-07  | 7.96E-08  | -4.04E-08 | -4.92E-08 | 3.11E-12  | -8.19E-08 | -9.05E-08 |

## SUPPORTING INFORMATION

|    |    |           |           |           |           |           |           |           |           |
|----|----|-----------|-----------|-----------|-----------|-----------|-----------|-----------|-----------|
| 10 | 5  | -6.91E-08 | 5.31E-08  | -8.99E-08 | -5.16E-08 | 4.67E-08  | -2.39E-10 | -5.20E-08 | -2.69E-07 |
| 10 | 6  | -4.09E-08 | 3.17E-09  | -5.05E-09 | -1.68E-08 | 2.51E-09  | -8.86E-12 | -6.02E-09 | 9.56E-09  |
| 10 | 7  | -4.17E-08 | 2.30E-07  | 4.22E-08  | 1.24E-08  | -7.92E-09 | -7.00E-13 | 1.65E-09  | -2.48E-09 |
| 10 | 8  | 5.79E-10  | 8.67E-09  | 8.18E-10  | 1.61E-08  | -1.20E-08 | 7.40E-12  | -2.41E-09 | -1.34E-09 |
| 10 | 9  | -4.20E-08 | -3.28E-08 | -6.73E-09 | 2.65E-11  | -2.52E-08 | -2.83E-11 | -3.43E-09 | -6.95E-09 |
| 10 | 10 | -6.57E-09 | 1.40E-09  | -1.60E-08 | 3.43E-09  | -1.01E-08 | -2.51E-11 | -6.63E-08 | 1.60E-08  |

**Table S18:** Comparison of CASSCF computed SOC states and corresponding g-tensor values for the low-lying eight KDs for complexes **1-8** with a) 21 sextets and b) 21 sextet, 224 quartets and 490 doublets. All the energies are reported in  $\text{cm}^{-1}$ .

| a) 21 sextets |        |       |        | b) 21 sextet, 224 quartet and 490 doublets |        |       |        |
|---------------|--------|-------|--------|--------------------------------------------|--------|-------|--------|
| <b>1</b>      |        |       |        |                                            |        |       |        |
| SOC states    | gx     | gy    | gz     | SOC states                                 | gx     | gy    | gz     |
| 0.0           | 0.000  | 0.000 | 19.980 | 0.0                                        | 0.000  | 0.000 | 19.893 |
| 487.4         | 0.000  | 0.000 | 17.014 | 484.8                                      | 0.000  | 0.000 | 16.988 |
| 785.0         | 0.009  | 0.010 | 14.326 | 778.5                                      | 0.009  | 0.010 | 14.299 |
| 999.4         | 0.096  | 0.105 | 11.598 | 995.1                                      | 0.098  | 0.107 | 11.585 |
| 1198.5        | 0.469  | 0.635 | 8.988  | 1194.3                                     | 0.498  | 0.665 | 8.976  |
| 1385.7        | 1.341  | 2.304 | 6.342  | 1377.6                                     | 1.509  | 2.504 | 6.314  |
| 1538.6        | 3.227  | 4.480 | 7.803  | 1524.2                                     | 3.183  | 4.617 | 8.205  |
| 1649.2        | 0.863  | 4.151 | 16.490 | 1631.6                                     | 0.822  | 3.778 | 16.690 |
| <b>2</b>      |        |       |        |                                            |        |       |        |
| 0.0           | 0.000  | 0.000 | 19.944 | 0.0                                        | 0.000  | 0.000 | 19.859 |
| 409.6         | 0.000  | 0.000 | 17.047 | 408.2                                      | 0.000  | 0.000 | 17.014 |
| 689.2         | 0.004  | 0.005 | 14.392 | 684.9                                      | 0.004  | 0.004 | 14.366 |
| 889.1         | 0.001  | 0.007 | 11.718 | 885.3                                      | 0.000  | 0.007 | 11.701 |
| 1062.4        | 0.035  | 0.037 | 9.043  | 1057.7                                     | 0.034  | 0.038 | 9.041  |
| 1208.9        | 0.969  | 1.336 | 6.263  | 1201.2                                     | 1.001  | 1.364 | 6.263  |
| 1305.0        | 8.519  | 8.157 | 2.690  | 1294.8                                     | 8.461  | 8.099 | 2.699  |
| 1423.5        | 0.297  | 0.954 | 17.841 | 1407.4                                     | 0.306  | 0.989 | 17.769 |
| <b>3</b>      |        |       |        |                                            |        |       |        |
| 0.0           | 0.000  | 0.000 | 19.986 | 0.0                                        | 0.000  | 0.000 | 19.900 |
| 541.7         | 0.000  | 0.000 | 16.963 | 539.7                                      | 0.000  | 0.000 | 16.946 |
| 845.2         | 0.005  | 0.006 | 14.370 | 837.3                                      | 0.005  | 0.006 | 14.346 |
| 1033.6        | 0.001  | 0.011 | 11.742 | 1029.6                                     | 0.001  | 0.010 | 11.718 |
| 1215.3        | 0.056  | 0.067 | 9.025  | 1213.0                                     | 0.055  | 0.066 | 9.025  |
| 1404.1        | 0.047  | 0.161 | 6.316  | 1398.2                                     | 0.051  | 0.162 | 6.340  |
| 1569.5        | 2.742  | 3.097 | 3.618  | 1556.3                                     | 2.672  | 3.024 | 3.650  |
| 1675.4        | 13.295 | 7.481 | 1.119  | 1655.2                                     | 13.197 | 7.523 | 1.136  |
| <b>4</b>      |        |       |        |                                            |        |       |        |

## SUPPORTING INFORMATION

|          |        |       |        |        |        |       |        |
|----------|--------|-------|--------|--------|--------|-------|--------|
| 0.0      | 0.000  | 0.000 | 19.976 | 0.0    | 0.000  | 0.000 | 19.889 |
| 373.2    | 0.000  | 0.000 | 17.137 | 369.4  | 0.000  | 0.000 | 17.099 |
| 584.1    | 0.001  | 0.001 | 14.484 | 578.3  | 0.001  | 0.001 | 14.444 |
| 733.4    | 0.034  | 0.037 | 11.729 | 729.6  | 0.031  | 0.033 | 11.706 |
| 879.0    | 0.237  | 0.312 | 9.107  | 874.9  | 0.235  | 0.304 | 9.092  |
| 1016.5   | 1.289  | 1.955 | 6.472  | 1009.6 | 1.340  | 1.993 | 6.457  |
| 1124.8   | 3.309  | 3.384 | 7.521  | 1114.2 | 3.148  | 3.411 | 7.350  |
| 1200.5   | 0.922  | 4.677 | 15.285 | 1185.1 | 0.945  | 4.821 | 15.122 |
| <b>5</b> |        |       |        |        |        |       |        |
| 0.0      | 0.194  | 0.315 | 9.745  | 0.0    | 0.168  | 0.304 | 9.733  |
| 14.9     | 0.015  | 0.122 | 12.038 | 13.4   | 0.023  | 0.125 | 12.009 |
| 29.8     | 0.110  | 0.361 | 6.676  | 31.0   | 0.093  | 0.350 | 6.629  |
| 73.7     | 1.680  | 1.940 | 3.861  | 75.4   | 1.641  | 1.904 | 3.857  |
| 97.9     | 1.806  | 2.985 | 11.261 | 95.3   | 0.746  | 1.433 | 12.962 |
| 108.4    | 4.750  | 6.936 | 9.358  | 109.0  | 10.831 | 7.987 | 2.980  |
| 272.3    | 0.000  | 0.000 | 17.424 | 265.8  | 0.000  | 0.001 | 17.332 |
| 489.7    | 0.000  | 0.000 | 19.991 | 484.7  | 0.000  | 0.000 | 19.900 |
| <b>6</b> |        |       |        |        |        |       |        |
| 0.0      | 0.000  | 0.000 | 19.998 | 0.0    | 0.000  | 0.000 | 19.911 |
| 520.4    | 0.000  | 0.000 | 16.987 | 515.9  | 0.000  | 0.000 | 16.968 |
| 778.5    | 0.009  | 0.009 | 14.439 | 768.9  | 0.009  | 0.009 | 14.404 |
| 932.0    | 0.005  | 0.012 | 11.816 | 927.8  | 0.005  | 0.011 | 11.782 |
| 1096.5   | 0.006  | 0.013 | 9.058  | 1094.8 | 0.006  | 0.012 | 9.053  |
| 1284.8   | 0.208  | 0.221 | 6.301  | 1280.0 | 0.211  | 0.223 | 6.327  |
| 1461.9   | 0.857  | 1.298 | 3.660  | 1449.1 | 0.915  | 1.366 | 3.696  |
| 1573.7   | 11.607 | 9.451 | 1.188  | 1553.4 | 11.634 | 9.354 | 1.204  |
| <b>7</b> |        |       |        |        |        |       |        |
| 0.0      | 0.000  | 0.000 | 19.996 | 0.0    | 0.000  | 0.000 | 19.909 |
| 452.3    | 0.000  | 0.000 | 17.040 | 446.6  | 0.000  | 0.000 | 17.012 |
| 650.6    | 0.033  | 0.034 | 14.500 | 641.7  | 0.031  | 0.031 | 14.454 |
| 760.6    | 0.028  | 0.035 | 11.882 | 756.4  | 0.025  | 0.033 | 11.838 |
| 887.4    | 0.033  | 0.041 | 9.124  | 885.1  | 0.033  | 0.040 | 9.110  |
| 1041.3   | 0.346  | 0.403 | 6.365  | 1036.0 | 0.355  | 0.412 | 6.382  |
| 1189.9   | 0.396  | 1.136 | 3.713  | 1177.9 | 0.431  | 1.191 | 3.741  |
| 1284.1   | 11.322 | 9.789 | 1.212  | 1266.1 | 11.329 | 9.707 | 1.226  |
| <b>8</b> |        |       |        |        |        |       |        |

## SUPPORTING INFORMATION

|        |        |       |        |        |        |       |        |
|--------|--------|-------|--------|--------|--------|-------|--------|
| 0.0    | 0.000  | 0.000 | 19.998 | 0.0    | 0.000  | 0.000 | 19.911 |
| 457.9  | 0.000  | 0.000 | 17.041 | 451.4  | 0.000  | 0.000 | 17.014 |
| 654.8  | 0.008  | 0.008 | 14.509 | 645.9  | 0.007  | 0.007 | 14.461 |
| 768.8  | 0.005  | 0.010 | 11.889 | 765.8  | 0.005  | 0.009 | 11.842 |
| 906.7  | 0.020  | 0.024 | 9.109  | 906.4  | 0.020  | 0.024 | 9.096  |
| 1076.4 | 0.251  | 0.287 | 6.334  | 1073.4 | 0.263  | 0.299 | 6.355  |
| 1241.5 | 0.374  | 0.910 | 3.686  | 1231.2 | 0.410  | 0.971 | 3.719  |
| 1347.0 | 11.189 | 9.907 | 1.201  | 1329.8 | 11.202 | 9.823 | 1.217  |

**Table S19:** DFT optimized coordinates of complexes 1-8.

| <i>Complex 1</i> |                 |                 |                 | <i>Complex 2</i> |                 |                 |                 |
|------------------|-----------------|-----------------|-----------------|------------------|-----------------|-----------------|-----------------|
| Dy               | 0.000000000000  | 0.000000000000  | 0.000000000000  | Dy               | 0.000000000000  | 0.000000000000  | 0.000000000000  |
| C                | 0.631249000000  | -1.171237000000 | -2.264617000000 | C                | -0.682416000000 | -1.098949000000 | -2.233554000000 |
| C                | 1.859401000000  | -0.648065000000 | -1.751772000000 | C                | -0.157339000000 | -2.168769000000 | -1.454978000000 |
| C                | 1.774261000000  | 0.766969000000  | -1.771127000000 | C                | 1.248006000000  | -1.938455000000 | -1.279810000000 |
| C                | 0.494993000000  | 1.125825000000  | -2.296794000000 | C                | 1.574566000000  | -0.723216000000 | -1.948067000000 |
| C                | -0.201122000000 | -0.073492000000 | -2.611613000000 | C                | 0.380036000000  | -0.201442000000 | -2.528903000000 |
| C                | 0.471850000000  | -2.568643000000 | -2.818229000000 | C                | -2.001619000000 | -1.123581000000 | -2.965794000000 |
| C                | 3.152247000000  | -1.422207000000 | -1.673853000000 | C                | -0.826762000000 | -3.521781000000 | -1.338592000000 |
| C                | 2.963824000000  | 1.693404000000  | -1.713333000000 | C                | 2.254432000000  | -3.033796000000 | -0.987247000000 |
| C                | 0.167448000000  | 2.480909000000  | -2.879964000000 | C                | 2.964127000000  | -0.331640000000 | -2.396433000000 |
| C                | -1.372982000000 | -0.155102000000 | -3.562211000000 | C                | 0.336351000000  | 0.843492000000  | -3.617366000000 |
| C                | 1.877450000000  | -3.021305000000 | -3.281730000000 | C                | -2.273864000000 | -2.608431000000 | -3.299542000000 |
| C                | 3.071462000000  | -2.510729000000 | -2.773063000000 | C                | -1.744014000000 | -3.672532000000 | -2.578455000000 |
| C                | 4.251210000000  | -0.495268000000 | -2.249060000000 | C                | 0.264732000000  | -4.572995000000 | -1.652025000000 |
| C                | 4.167673000000  | 0.892976000000  | -2.265871000000 | C                | 1.628870000000  | -4.353152000000 | -1.501262000000 |
| C                | 2.754909000000  | 2.739749000000  | -2.836399000000 | C                | 3.415320000000  | -2.852490000000 | -1.995811000000 |
| C                | 1.508411000000  | 3.090610000000  | -3.355436000000 | C                | 3.736777000000  | -1.654036000000 | -2.616053000000 |
| C                | -0.542160000000 | 2.212953000000  | -4.230619000000 | C                | 2.829761000000  | 0.175873000000  | -3.853639000000 |
| C                | -1.230930000000 | 1.041325000000  | -4.533260000000 | C                | 1.665031000000  | 0.706518000000  | -4.396148000000 |
| C                | -1.085883000000 | -1.347556000000 | -4.504758000000 | C                | -0.684162000000 | 0.335566000000  | -4.698607000000 |
| C                | -0.262171000000 | -2.420837000000 | -4.174727000000 | C                | -1.726182000000 | -0.540203000000 | -4.373364000000 |
| C                | 1.812755000000  | -3.435914000000 | -4.661457000000 | C                | -2.492007000000 | -2.745385000000 | -4.719609000000 |
| C                | 4.224742000000  | -2.408748000000 | -3.631317000000 | C                | -1.426243000000 | -4.903803000000 | -3.261930000000 |
| C                | 4.944812000000  | -1.180627000000 | -3.313561000000 | C                | -0.200283000000 | -5.449844000000 | -2.698607000000 |
| C                | 4.774583000000  | 1.631090000000  | -3.348001000000 | C                | 2.561793000000  | -5.016391000000 | -2.385297000000 |
| C                | 3.913131000000  | 2.756922000000  | -3.693764000000 | C                | 3.648391000000  | -4.099275000000 | -2.689303000000 |
| C                | 1.395936000000  | 3.459254000000  | -4.744995000000 | C                | 4.293117000000  | -1.670311000000 | -3.950933000000 |
| C                | 0.144575000000  | 2.928469000000  | -5.278111000000 | C                | 3.743536000000  | -0.554257000000 | -4.703403000000 |
| C                | -1.244405000000 | 0.556414000000  | -5.893010000000 | C                | 1.377907000000  | 0.510650000000  | -5.796424000000 |
| C                | -1.155534000000 | -0.899965000000 | -5.875246000000 | C                | -0.051755000000 | 0.288064000000  | -5.961057000000 |
| C                | 0.507213000000  | -3.072641000000 | -5.205734000000 | C                | -2.157845000000 | -1.486762000000 | -5.372428000000 |
| C                | 2.952208000000  | -3.403799000000 | -5.492886000000 | C                | -2.247293000000 | -3.967053000000 | -5.384281000000 |
| C                | 4.194034000000  | -2.878591000000 | -4.963579000000 | C                | -1.701653000000 | -5.073730000000 | -4.635970000000 |
| C                | 5.604454000000  | -0.466471000000 | -4.336194000000 | C                | 0.704500000000  | -6.153571000000 | -3.526945000000 |
| C                | 5.516565000000  | 0.977259000000  | -4.354040000000 | C                | 2.122644000000  | -5.932769000000 | -3.363659000000 |
| C                | 3.827342000000  | 3.186337000000  | -5.037520000000 | C                | 4.262448000000  | -4.130971000000 | -3.961899000000 |
| C                | 2.531924000000  | 3.546549000000  | -5.577367000000 | C                | 4.593836000000  | -2.882672000000 | -4.669727000000 |
| C                | 0.078970000000  | 2.502849000000  | -6.622266000000 | C                | 3.511382000000  | -0.686693000000 | -6.089159000000 |
| C                | -0.635817000000 | 1.284010000000  | -6.937202000000 | C                | 2.296297000000  | -0.142768000000 | -6.650334000000 |
| C                | -0.462153000000 | -1.573042000000 | -6.902914000000 | C                | -0.513254000000 | -0.584463000000 | -6.969633000000 |
| C                | 0.393201000000  | -2.690084000000 | -6.560270000000 | C                | -1.591148000000 | -1.495896000000 | -6.667465000000 |
| C                | 2.835926000000  | -2.990603000000 | -6.886507000000 | C                | -1.643839000000 | -3.974654000000 | -6.715650000000 |
| C                | 4.853636000000  | -2.125834000000 | -6.021855000000 | C                | -0.752555000000 | -5.779465000000 | -5.494838000000 |
| C                | 5.547988000000  | -0.940053000000 | -5.717349000000 | C                | 0.426798000000  | -6.313915000000 | -4.949753000000 |
| C                | 5.405977000000  | 1.407315000000  | -5.746142000000 | C                | 2.739211000000  | -5.947309000000 | -4.686768000000 |
| C                | 4.574901000000  | 2.494650000000  | -6.078275000000 | C                | 3.791993000000  | -5.063095000000 | -4.980248000000 |
| C                | 2.467952000000  | 3.087945000000  | -6.959600000000 | C                | 4.330252000000  | -3.027227000000 | -6.037648000000 |
| C                | 1.259758000000  | 2.573066000000  | -7.475086000000 | C                | 3.798312000000  | -1.948727000000 | -6.764489000000 |



# SUPPORTING INFORMATION

|   |                 |                 |                 |   |                 |                 |                 |
|---|-----------------|-----------------|-----------------|---|-----------------|-----------------|-----------------|
| C | 3.273777000000  | -2.899393000000 | -4.232819000000 | C | 3.721681000000  | 2.005078000000  | -2.389261000000 |
| C | 4.747313000000  | -0.532386000000 | -3.832740000000 | C | 1.782865000000  | 3.049693000000  | -3.294083000000 |
| C | 4.667075000000  | 0.923380000000  | -3.851006000000 | C | 0.544410000000  | 2.806045000000  | -3.866721000000 |
| C | 2.946072000000  | 3.107273000000  | -4.303272000000 | C | -0.960741000000 | 1.079076000000  | -4.540786000000 |
| C | 1.582985000000  | 3.479878000000  | -4.666480000000 | C | -1.138556000000 | -0.297416000000 | -4.603542000000 |
| C | -0.954863000000 | 2.463124000000  | -5.351452000000 | C | -0.120234000000 | -2.398666000000 | -4.107032000000 |
| C | -1.720021000000 | 1.238134000000  | -5.560361000000 | C | 1.011783000000  | -2.999593000000 | -3.574910000000 |
| C | -1.567800000000 | -1.577048000000 | -5.527410000000 | C | 3.140165000000  | -2.576243000000 | -2.598928000000 |
| C | 0.217640000000  | -3.120122000000 | -6.302945000000 | C | 4.011460000000  | -1.574233000000 | -2.209561000000 |
| C | 1.569602000000  | -3.489463000000 | -5.940655000000 | C | 5.281820000000  | 0.230478000000  | -3.021541000000 |
| C | 4.148060000000  | -2.456320000000 | -5.247061000000 | C | 4.088808000000  | 2.700239000000  | -3.604456000000 |
| C | 4.906711000000  | -1.241041000000 | -5.040926000000 | C | 2.912892000000  | 3.332857000000  | -4.154495000000 |
| C | 4.751056000000  | 1.617768000000  | -5.074781000000 | C | 0.406911000000  | 2.835037000000  | -5.307726000000 |
| C | 3.865830000000  | 2.739252000000  | -5.307563000000 | C | -0.506283000000 | 1.791734000000  | -5.715701000000 |
| C | 1.190311000000  | 3.469128000000  | -6.021066000000 | C | -0.860763000000 | -0.989913000000 | -5.842622000000 |
| C | -0.113238000000 | 2.948674000000  | -6.373331000000 | C | -0.243694000000 | -2.261922000000 | -5.541780000000 |
| C | -1.610894000000 | 0.542702000000  | -6.782286000000 | C | 2.042443000000  | -3.484187000000 | -4.471193000000 |
| C | -1.531634000000 | -0.901755000000 | -6.764751000000 | C | 3.333315000000  | -3.225240000000 | -3.879697000000 |
| C | 0.266183000000  | -2.408178000000 | -7.574823000000 | C | 5.100152000000  | -1.200225000000 | -3.878113000000 |
| C | 2.466475000000  | -3.009243000000 | -6.985204000000 | C | 5.704870000000  | 0.940385000000  | -4.175169000000 |
| C | 3.733001000000  | -2.501096000000 | -6.644295000000 | C | 5.094722000000  | 2.203679000000  | -4.473442000000 |
| C | 4.967979000000  | -0.522367000000 | -6.309875000000 | C | 2.771276000000  | 3.446757000000  | -5.562213000000 |
| C | 4.891955000000  | 0.881159000000  | -6.326756000000 | C | 1.490198000000  | 3.191072000000  | -6.152064000000 |
| C | 3.449299000000  | 2.705926000000  | -6.704748000000 | C | -0.309247000000 | 1.131133000000  | -6.956334000000 |
| C | 2.135324000000  | 3.066217000000  | -7.055846000000 | C | -0.490646000000 | -0.290172000000 | -7.021032000000 |
| C | 0.013525000000  | 2.216988000000  | -7.629360000000 | C | 0.724253000000  | -2.802059000000 | -6.428331000000 |
| C | -0.720799000000 | 1.034849000000  | -7.829032000000 | C | 1.892874000000  | -3.427732000000 | -5.881113000000 |
| C | -0.591840000000 | -1.317567000000 | -7.800412000000 | C | 4.441891000000  | -2.921606000000 | -4.711460000000 |
| C | 1.659673000000  | -2.339286000000 | -7.997717000000 | C | 5.347069000000  | -1.885679000000 | -4.306029000000 |
| C | 4.241170000000  | -1.303778000000 | -7.303268000000 | C | 5.945431000000  | 0.238365000000  | -5.435301000000 |
| C | 4.085037000000  | 1.556033000000  | -7.336348000000 | C | 4.945762000000  | 2.310659000000  | -5.924377000000 |
| C | 1.407227000000  | 2.290063000000  | -8.052261000000 | C | 3.801860000000  | 2.919008000000  | -6.459711000000 |
| C | -0.090495000000 | -0.118272000000 | -8.460146000000 | C | 1.699674000000  | 2.502181000000  | -7.427276000000 |
| C | 2.147228000000  | -1.179574000000 | -8.632566000000 | C | 0.814985000000  | 1.490364000000  | -7.822741000000 |
| C | 3.460836000000  | -0.652710000000 | -8.279276000000 | C | 0.517921000000  | -0.839734000000 | -7.927027000000 |
| C | 3.381404000000  | 0.801822000000  | -8.296268000000 | C | 1.115106000000  | -2.075261000000 | -7.635274000000 |
| C | 2.018921000000  | 1.175201000000  | -8.660888000000 | C | 3.032589000000  | -3.101416000000 | -6.740536000000 |
| C | 1.256431000000  | -0.049621000000 | -8.868833000000 | C | 4.284790000000  | -2.851677000000 | -6.165205000000 |
| C | -2.162343000000 | -2.292091000000 | -2.159105000000 | C | 5.767838000000  | -1.151544000000 | -5.500187000000 |
| C | 1.827265000000  | -3.423219000000 | -1.116990000000 | C | 5.472062000000  | 1.089226000000  | -6.519096000000 |
| C | 4.139665000000  | 0.215568000000  | -0.525906000000 | C | 3.134735000000  | 2.334395000000  | -7.615291000000 |
| C | 1.459758000000  | 3.539926000000  | -1.194567000000 | C | 1.326818000000  | 0.265353000000  | -8.422118000000 |
| C | -2.400529000000 | 1.958081000000  | -2.214561000000 | C | 2.547195000000  | -2.261075000000 | -7.827416000000 |
| C | -0.372890000000 | -1.163072000000 | 2.248895000000  | C | 5.107268000000  | -1.751777000000 | -6.651431000000 |
| C | 0.996755000000  | -0.708099000000 | 2.311050000000  | C | 4.824018000000  | 0.513939000000  | -7.630431000000 |
| C | 0.987483000000  | 0.724428000000  | 2.312083000000  | C | 3.634789000000  | 1.148366000000  | -8.189395000000 |
| C | -0.387136000000 | 1.156648000000  | 2.248046000000  | C | 2.714668000000  | 0.095131000000  | -8.598097000000 |
| C | -1.224212000000 | -0.009905000000 | 2.222744000000  | C | 3.336165000000  | -1.190888000000 | -8.294902000000 |
| H | -1.651609000000 | -2.897332000000 | -1.386350000000 | C | 4.638823000000  | -0.932412000000 | -7.697605000000 |
| H | -2.870121000000 | -2.953681000000 | -2.687046000000 | C | 4.137685000000  | -0.503982000000 | 0.124617000000  |
| H | -2.754057000000 | -1.495933000000 | -1.667505000000 | C | 2.226033000000  | 3.343778000000  | -0.756951000000 |
| H | 2.420144000000  | -2.970269000000 | -0.302589000000 | C | -1.642738000000 | 2.527945000000  | -2.492944000000 |
| H | 2.281801000000  | -4.394736000000 | -1.375610000000 | C | -2.187189000000 | -1.717205000000 | -2.690194000000 |
| H | 0.802152000000  | -3.616055000000 | -0.748630000000 | C | 1.336806000000  | -3.644180000000 | -1.086501000000 |
| H | 3.900521000000  | -0.678376000000 | 0.075980000000  | H | 3.897322000000  | 0.403522000000  | 0.702584000000  |
| H | 3.817610000000  | 1.115941000000  | 0.025943000000  | H | 5.231741000000  | -0.641860000000 | 0.139332000000  |
| H | 5.234354000000  | 0.263536000000  | -0.654081000000 | H | 3.674683000000  | -1.378632000000 | 0.611895000000  |
| H | 2.117370000000  | 3.176884000000  | -0.384252000000 | H | 1.181786000000  | 3.634851000000  | -0.548350000000 |
| H | 0.426988000000  | 3.621240000000  | -0.808324000000 | H | 2.811857000000  | 4.261597000000  | -0.934680000000 |
| H | 1.795383000000  | 4.551262000000  | -1.480881000000 | H | 2.637975000000  | 2.839242000000  | 0.134328000000  |
| H | -2.909763000000 | 1.111886000000  | -1.713944000000 | H | -1.239380000000 | 3.065511000000  | -1.614994000000 |
| H | -3.168304000000 | 2.529713000000  | -2.763196000000 | H | -2.384987000000 | 1.781629000000  | -2.154032000000 |
| H | -1.967437000000 | 2.628524000000  | -1.448538000000 | H | -2.173838000000 | 3.260877000000  | -3.123021000000 |
| C | 2.181537000000  | 1.619627000000  | 2.498992000000  | H | -2.728485000000 | -0.847183000000 | -2.273050000000 |
| C | 2.292993000000  | 1.900989000000  | 3.563831000000  | H | -1.937655000000 | -2.419111000000 | -1.873397000000 |
| H | 3.118442000000  | 1.124090000000  | 2.196031000000  | H | -2.875125000000 | -2.235690000000 | -3.379415000000 |
| H | 2.096726000000  | 2.560973000000  | 1.928679000000  | H | 1.844259000000  | -3.341025000000 | -0.153836000000 |
| C | 2.197178000000  | -1.592716000000 | 2.504005000000  | H | 1.684757000000  | -4.655874000000 | -1.356170000000 |
| H | 2.382678000000  | -1.761711000000 | 3.582330000000  | H | 0.249551000000  | -3.690384000000 | -0.900072000000 |
| H | 2.060077000000  | -2.587508000000 | 2.046759000000  | H | -2.282849000000 | -1.044748000000 | 2.357109000000  |



# SUPPORTING INFORMATION

|                  |                 |                 |                 |                  |                 |                 |
|------------------|-----------------|-----------------|-----------------|------------------|-----------------|-----------------|
| H                | 3.116121000000  | -1.149230000000 | 2.086949000000  |                  |                 |                 |
| C                | -0.870569000000 | 2.582048000000  | 2.237138000000  |                  |                 |                 |
| H                | -1.689733000000 | 2.752707000000  | 1.511309000000  |                  |                 |                 |
| H                | -1.275783000000 | 2.868692000000  | 3.226982000000  |                  |                 |                 |
| H                | -0.060124000000 | 3.292491000000  | 2.003415000000  |                  |                 |                 |
| C                | -2.728576000000 | -0.008060000000 | 2.148228000000  |                  |                 |                 |
| H                | -3.130142000000 | -0.946086000000 | 1.725209000000  |                  |                 |                 |
| H                | -3.176101000000 | 0.100185000000  | 3.154923000000  |                  |                 |                 |
| H                | -3.123358000000 | 0.831786000000  | 1.545817000000  |                  |                 |                 |
| C                | -0.814473000000 | -2.602154000000 | 2.245308000000  |                  |                 |                 |
| H                | -0.093108000000 | -3.258522000000 | 1.724706000000  |                  |                 |                 |
| H                | -0.905315000000 | -2.991599000000 | 3.278391000000  |                  |                 |                 |
| H                | -1.802969000000 | -2.737934000000 | 1.770829000000  |                  |                 |                 |
| <i>Complex 5</i> |                 |                 |                 | <i>Complex 6</i> |                 |                 |
| Dy               | 0.000000000000  | 0.000000000000  | 0.000000000000  | Dy               | 0.000000000000  | 0.000000000000  |
| C                | 1.081411000000  | -0.594057000000 | -2.325301000000 | C                | 1.051780000000  | 0.606196000000  |
| C                | 0.917539000000  | 0.820408000000  | -2.328089000000 | C                | -0.256812000000 | 1.189150000000  |
| C                | -0.478478000000 | 1.100532000000  | -2.338155000000 | C                | -1.209468000000 | 0.129348000000  |
| C                | -1.176397000000 | -0.139760000000 | -2.339298000000 | C                | -0.490115000000 | -1.111132000000 |
| C                | -0.212487000000 | -1.187123000000 | -2.332093000000 | C                | 0.904615000000  | -0.813561000000 |
| C                | 2.344680000000  | -1.304675000000 | -2.751667000000 | C                | 2.314171000000  | 1.322160000000  |
| C                | 1.982586000000  | 1.801234000000  | -2.759317000000 | C                | -0.544148000000 | 2.595354000000  |
| C                | -1.080758000000 | 2.415751000000  | -2.772740000000 | C                | -2.632919000000 | 0.270504000000  |
| C                | -2.613747000000 | -0.308320000000 | -2.771887000000 | C                | -1.064097000000 | -2.437880000000 |
| C                | -0.496099000000 | -2.607572000000 | -2.759750000000 | C                | 1.989921000000  | -1.784787000000 |
| C                | 3.080611000000  | -0.346786000000 | -3.720131000000 | C                | 1.882388000000  | 2.423085000000  |
| C                | 2.919439000000  | 1.035111000000  | -3.723949000000 | C                | 0.612608000000  | 2.986597000000  |
| C                | 1.300409000000  | 2.792339000000  | -3.733132000000 | C                | -1.720955000000 | 2.494058000000  |
| C                | -0.063108000000 | 3.065647000000  | -3.739297000000 | C                | -2.648668000000 | 1.462540000000  |
| C                | -2.235694000000 | 2.069920000000  | -3.743917000000 | C                | -2.886857000000 | -0.910415000000 |
| C                | -2.917379000000 | 0.857019000000  | -3.744180000000 | C                | -2.194463000000 | -2.114666000000 |
| C                | -2.640318000000 | -1.517470000000 | -3.737460000000 | C                | -0.016877000000 | -3.085721000000 |
| C                | -1.697810000000 | -2.540726000000 | -3.732267000000 | C                | 1.340532000000  | -2.796883000000 |
| C                | 0.645671000000  | -3.010846000000 | -3.723683000000 | C                | 2.935076000000  | -1.021745000000 |
| C                | 1.909649000000  | -2.429905000000 | -3.720447000000 | C                | 3.078801000000  | 0.359106000000  |
| C                | 3.353521000000  | -1.034479000000 | -4.959542000000 | C                | 2.644513000000  | 2.294768000000  |
| C                | 3.027368000000  | 1.760574000000  | -4.966963000000 | C                | 0.070274000000  | 3.438150000000  |
| C                | 2.039185000000  | 2.833220000000  | -4.972666000000 | C                | -1.355226000000 | 3.136637000000  |
| C                | -0.719988000000 | 3.387902000000  | -4.983633000000 | C                | -3.236649000000 | 1.042620000000  |
| C                | -2.045455000000 | 2.778941000000  | -4.986755000000 | C                | -3.384149000000 | -0.407198000000 |
| C                | -3.425458000000 | 0.325439000000  | -4.986208000000 | C                | -1.975227000000 | -2.845283000000 |
| C                | -3.256077000000 | -1.123464000000 | -4.981854000000 | C                | -0.643981000000 | -3.438806000000 |
| C                | -1.349306000000 | -3.194469000000 | -4.971051000000 | C                | 2.109158000000  | -2.852207000000 |
| C                | 0.081144000000  | -3.481719000000 | -4.965799000000 | C                | 3.084041000000  | -1.768791000000 |
| C                | 2.638879000000  | -2.306192000000 | -4.959510000000 | C                | 3.374481000000  | 1.032710000000  |
| C                | 3.532240000000  | -0.328757000000 | -6.168121000000 | C                | 2.151191000000  | 2.788259000000  |
| C                | 3.364053000000  | 1.108270000000  | -6.171974000000 | C                | 0.828985000000  | 3.377179000000  |
| C                | 1.423197000000  | 3.215838000000  | -6.183322000000 | C                | -1.970779000000 | 2.781165000000  |
| C                | 0.004539000000  | 3.501325000000  | -6.189138000000 | C                | -2.938799000000 | 1.705202000000  |
| C                | -2.598868000000 | 2.304914000000  | -6.195319000000 | C                | -3.233741000000 | -1.143034000000 |
| C                | -3.307469000000 | 1.043466000000  | -6.194988000000 | C                | -2.508957000000 | -2.396265000000 |
| C                | -2.975417000000 | -1.801513000000 | -6.186906000000 | C                | 0.107514000000  | -3.559598000000 |
| C                | -1.995680000000 | -2.866159000000 | -6.181699000000 | C                | 1.523004000000  | -3.259800000000 |
| C                | 0.812967000000  | -3.429812000000 | -6.171093000000 | C                | 3.436199000000  | -1.129650000000 |
| C                | 2.127986000000  | -2.826157000000 | -6.167839000000 | C                | 3.584131000000  | 0.309958000000  |
| C                | 2.978911000000  | -0.854552000000 | -7.412266000000 | C                | 2.347778000000  | 2.027583000000  |
| C                | 2.705847000000  | 1.486818000000  | -7.418166000000 | C                | 0.195735000000  | 2.985573000000  |
| C                | 1.752833000000  | 2.520757000000  | -7.423552000000 | C                | -1.178969000000 | 2.691874000000  |
| C                | -0.558058000000 | 2.985333000000  | -7.433409000000 | C                | -2.754316000000 | 0.939397000000  |
| C                | -1.835851000000 | 2.397637000000  | -7.436009000000 | C                | -2.901134000000 | -0.459343000000 |
| C                | -2.990926000000 | 0.343159000000  | -7.435424000000 | C                | -1.719975000000 | -2.498495000000 |
| C                | -2.827385000000 | -1.053453000000 | -7.431024000000 | C                | -0.434326000000 | -3.070112000000 |
| C                | -1.231458000000 | -2.787624000000 | -7.423119000000 | C                | 1.870630000000  | -2.581431000000 |
| C                | 0.147217000000  | -3.063277000000 | -7.417089000000 | C                | 2.810046000000  | -1.535549000000 |
| C                | 2.289592000000  | -2.080342000000 | -7.411985000000 | C                | 3.050969000000  | 0.808916000000  |
| C                | 2.466795000000  | 0.270450000000  | -8.186484000000 | C                | 1.136490000000  | 2.148750000000  |
| C                | 0.525402000000  | 2.377608000000  | -8.198021000000 | C                | -1.665045000000 | 1.551253000000  |

# SUPPORTING INFORMATION

|   |                 |                 |                 |   |                 |                 |                 |
|---|-----------------|-----------------|-----------------|---|-----------------|-----------------|-----------------|
| C | -2.078847000000 | 1.182317000000  | -8.204521000000 | C | -1.962377000000 | -1.299120000000 | -8.270434000000 |
| C | -1.747169000000 | -1.664293000000 | -8.197370000000 | C | 0.657377000000  | -2.464437000000 | -8.192345000000 |
| C | 1.061754000000  | -2.226649000000 | -8.185140000000 | C | 2.571780000000  | -0.333220000000 | -8.171600000000 |
| C | 1.280282000000  | 0.129988000000  | -8.935301000000 | C | 0.668368000000  | 1.044313000000  | -8.978693000000 |
| C | 0.292308000000  | 1.202157000000  | -8.940378000000 | C | -0.756883000000 | 0.740703000000  | -9.011477000000 |
| C | -1.032955000000 | 0.594159000000  | -8.944400000000 | C | -0.907165000000 | -0.708962000000 | -8.993915000000 |
| C | -0.864301000000 | -0.854632000000 | -8.941097000000 | C | 0.425475000000  | -1.302003000000 | -8.955678000000 |
| C | 0.565353000000  | -1.141130000000 | -8.934953000000 | C | 1.399053000000  | -0.218475000000 | -8.944836000000 |
| C | 3.227979000000  | -1.800969000000 | -1.585468000000 | C | 3.181171000000  | 1.855912000000  | -1.610230000000 |
| C | 2.722418000000  | 2.495645000000  | -1.594326000000 | C | -0.785406000000 | 3.636624000000  | -1.740813000000 |
| C | -1.506264000000 | 3.340413000000  | -1.611538000000 | C | -3.708641000000 | 0.380214000000  | -1.774441000000 |
| C | -3.624915000000 | -0.419016000000 | -1.609945000000 | C | -1.516254000000 | -3.370755000000 | -1.659418000000 |
| C | -0.694194000000 | -3.601588000000 | -1.594413000000 | C | 2.725685000000  | -2.457640000000 | -1.560752000000 |
| H | 3.532596000000  | -0.949081000000 | -0.952877000000 | H | 2.615312000000  | 2.593153000000  | -1.014422000000 |
| H | 4.135546000000  | -2.303569000000 | -1.962383000000 | H | 4.088568000000  | 2.353923000000  | -1.992229000000 |
| H | 2.664256000000  | -2.512566000000 | -0.957875000000 | H | 3.500965000000  | 1.026141000000  | -0.953902000000 |
| H | 1.999493000000  | 3.033071000000  | -0.955115000000 | H | -1.663480000000 | 3.356249000000  | -1.132435000000 |
| H | 3.466526000000  | 3.218335000000  | -1.972388000000 | H | -0.975024000000 | 4.634715000000  | -2.171624000000 |
| H | 3.244930000000  | 1.746767000000  | -0.973192000000 | H | 0.099482000000  | 3.713671000000  | -1.084413000000 |
| H | -0.634288000000 | 3.583587000000  | -0.978268000000 | H | -3.536847000000 | 1.273195000000  | -1.148565000000 |
| H | -2.259275000000 | 2.836088000000  | -0.980875000000 | H | -3.695155000000 | -0.520329000000 | -1.134532000000 |
| H | -1.938555000000 | 4.282157000000  | -1.992190000000 | H | -4.715489000000 | 0.465286000000  | -2.217950000000 |
| H | -3.597515000000 | 0.498395000000  | -0.995541000000 | H | -2.325596000000 | -2.899019000000 | -1.075125000000 |
| H | -3.370789000000 | -1.276600000000 | -0.962771000000 | H | -0.667943000000 | -3.596175000000 | -0.988726000000 |
| H | -4.651671000000 | -0.556472000000 | -1.991091000000 | H | -1.897244000000 | -4.326516000000 | -2.057921000000 |
| H | 0.211856000000  | -3.629275000000 | -0.963480000000 | H | 3.210048000000  | -1.695141000000 | -0.925450000000 |
| H | -0.892330000000 | -4.620888000000 | -1.970186000000 | H | 3.507144000000  | -3.147765000000 | -1.922032000000 |
| H | -1.544604000000 | -3.287872000000 | -0.963504000000 | H | 2.014893000000  | -3.039909000000 | -0.948592000000 |
| C | -0.054384000000 | -1.860186000000 | 1.739905000000  | C | 1.196178000000  | -0.128984000000 | 2.377163000000  |
| H | -0.087588000000 | -2.952619000000 | 1.643056000000  | C | 0.244254000000  | -1.188973000000 | 2.367308000000  |
| C | 1.276333000000  | -1.355169000000 | 1.738336000000  | C | -1.064624000000 | -0.606638000000 | 2.334159000000  |
| H | 2.027523000000  | -2.150031000000 | 1.642617000000  | C | -0.917925000000 | 0.813342000000  | 2.324278000000  |
| C | 1.858998000000  | -0.053997000000 | 1.746613000000  | C | 0.476897000000  | 1.111253000000  | 2.349656000000  |
| H | 2.952658000000  | -0.085624000000 | 1.656979000000  | C | 2.619609000000  | -0.269621000000 | 2.878414000000  |
| C | 1.354243000000  | 1.276425000000  | 1.748899000000  | C | 0.532014000000  | -2.595181000000 | 2.854744000000  |
| H | 2.150331000000  | 2.026232000000  | 1.656763000000  | C | -2.326908000000 | -1.323154000000 | 2.766285000000  |
| C | 0.054624000000  | 1.860006000000  | 1.739439000000  | C | -2.003604000000 | 1.784265000000  | 2.736260000000  |
| H | 0.087271000000  | 2.952777000000  | 1.641755000000  | C | 1.050342000000  | 2.438107000000  | 2.803417000000  |
| C | -1.276402000000 | 1.354519000000  | 1.739477000000  | C | 2.635401000000  | -1.461798000000 | 3.864779000000  |
| H | -2.027363000000 | 2.149552000000  | 1.644176000000  | C | 1.707834000000  | -2.493599000000 | 3.855093000000  |
| C | -1.858942000000 | 0.054417000000  | 1.748629000000  | C | -0.625569000000 | -2.986995000000 | 3.802882000000  |
| H | -2.951527000000 | 0.086899000000  | 1.653455000000  | C | -1.895333000000 | -2.423531000000 | 3.762928000000  |
| C | -1.354470000000 | -1.276015000000 | 1.745666000000  | C | -3.092439000000 | -0.360171000000 | 3.703889000000  |
| H | -2.151026000000 | -2.026754000000 | 1.656158000000  | C | -2.949010000000 | 1.020635000000  | 3.690681000000  |
|   |                 |                 |                 | C | -1.355173000000 | 2.796128000000  | 3.708402000000  |
|   |                 |                 |                 | C | 0.001986000000  | 3.085724000000  | 3.738441000000  |
|   |                 |                 |                 | C | 2.179833000000  | 2.115387000000  | 3.808477000000  |
|   |                 |                 |                 | C | 2.872864000000  | 0.911472000000  | 3.843885000000  |
|   |                 |                 |                 | C | 3.221768000000  | -1.041584000000 | 5.116295000000  |
|   |                 |                 |                 | C | 1.340980000000  | -3.136269000000 | 5.095690000000  |
|   |                 |                 |                 | C | -0.084454000000 | -3.438193000000 | 5.062985000000  |
|   |                 |                 |                 | C | -2.658957000000 | -2.295629000000 | 4.980557000000  |
|   |                 |                 |                 | C | -3.389177000000 | -1.033782000000 | 4.945219000000  |
|   |                 |                 |                 | C | -3.099688000000 | 1.767713000000  | 4.917482000000  |
|   |                 |                 |                 | C | -2.125200000000 | 2.851373000000  | 4.928461000000  |
|   |                 |                 |                 | C | 0.627599000000  | 3.438969000000  | 4.990258000000  |
|   |                 |                 |                 | C | 1.959071000000  | 2.846059000000  | 5.032478000000  |
|   |                 |                 |                 | C | 3.368716000000  | 0.408361000000  | 5.101865000000  |
|   |                 |                 |                 | C | 2.922673000000  | -1.704177000000 | 6.324259000000  |
|   |                 |                 |                 | C | 1.955019000000  | -2.780414000000 | 6.313685000000  |
|   |                 |                 |                 | C | -0.844504000000 | -3.377326000000 | 6.248931000000  |
|   |                 |                 |                 | C | -2.166906000000 | -2.788968000000 | 6.206875000000  |
|   |                 |                 |                 | C | -3.600473000000 | -0.311085000000 | 6.137092000000  |
|   |                 |                 |                 | C | -3.453104000000 | 1.128612000000  | 6.123257000000  |
|   |                 |                 |                 | C | -1.540643000000 | 3.259343000000  | 6.144632000000  |
|   |                 |                 |                 | C | -0.125250000000 | 3.559558000000  | 6.176287000000  |
|   |                 |                 |                 | C | 2.491589000000  | 2.397271000000  | 6.259062000000  |
|   |                 |                 |                 | C | 3.216594000000  | 1.144208000000  | 6.294509000000  |
|   |                 |                 |                 | C | 2.736464000000  | -0.938323000000 | 7.552603000000  |
|   |                 |                 |                 | C | 1.161768000000  | -2.691307000000 | 7.535362000000  |



# SUPPORTING INFORMATION

|   |                 |                 |                 |   |                 |                 |                 |
|---|-----------------|-----------------|-----------------|---|-----------------|-----------------|-----------------|
| C | -1.410871000000 | -3.210600000000 | 5.278915000000  | C | 2.988097000000  | 1.663575000000  | -5.038105000000 |
| C | -2.599683000000 | -2.333321000000 | 5.292715000000  | C | 2.013414000000  | 2.739708000000  | -5.057995000000 |
| C | -3.467547000000 | 0.392785000000  | 5.299913000000  | C | -0.748110000000 | 3.316726000000  | -5.058387000000 |
| C | -2.545625000000 | 2.379186000000  | 6.488213000000  | C | -2.654016000000 | 2.225427000000  | -6.233092000000 |
| C | -1.359953000000 | 3.230845000000  | 6.471896000000  | C | -3.374445000000 | 0.975427000000  | -6.200848000000 |
| C | 1.500045000000  | 3.210772000000  | 6.435549000000  | C | -3.057253000000 | -1.889674000000 | -6.132018000000 |
| C | 2.675475000000  | 2.343992000000  | 6.420911000000  | C | -2.087369000000 | -2.962316000000 | -6.111300000000 |
| C | 3.544513000000  | -0.384163000000 | 6.414392000000  | C | 0.734513000000  | -3.551305000000 | -6.111493000000 |
| C | 3.087077000000  | -1.771160000000 | 6.423744000000  | C | 2.051570000000  | -2.955487000000 | -6.131251000000 |
| C | 0.761669000000  | -3.438134000000 | 6.455864000000  | C | 3.486043000000  | -0.454322000000 | -6.199320000000 |
| C | -0.697835000000 | -3.428378000000 | 6.473740000000  | C | 3.326939000000  | 0.979000000000  | -6.231994000000 |
| C | -3.001122000000 | -1.729128000000 | 6.500497000000  | C | 1.387766000000  | 3.115056000000  | -6.273381000000 |
| C | -3.443439000000 | -0.337169000000 | 6.503695000000  | C | -0.024215000000 | 3.408794000000  | -6.273220000000 |
| C | -2.528970000000 | 1.614819000000  | 7.727236000000  | C | -1.891935000000 | 2.286096000000  | -7.475443000000 |
| C | -0.618209000000 | 2.986536000000  | 7.701832000000  | C | -3.064397000000 | 0.237760000000  | -7.419125000000 |
| C | 0.789072000000  | 2.978402000000  | 7.684476000000  | C | -2.911540000000 | -1.162907000000 | -7.387281000000 |
| C | 2.681715000000  | 1.580960000000  | 7.659270000000  | C | -1.325171000000 | -2.911865000000 | -7.351411000000 |
| C | 3.108989000000  | 0.237328000000  | 7.655937000000  | C | 0.055842000000  | -3.199869000000 | -7.351409000000 |
| C | 2.372057000000  | -1.997322000000 | 7.672469000000  | C | 2.209017000000  | -2.229977000000 | -7.386680000000 |
| C | 1.228409000000  | -2.817746000000 | 7.688617000000  | C | 2.909361000000  | -1.007292000000 | -7.418565000000 |
| C | -1.124043000000 | -2.800418000000 | 7.716172000000  | C | 2.653145000000  | 1.339532000000  | -7.474994000000 |
| C | -2.259029000000 | -1.964618000000 | 7.729228000000  | C | 1.705427000000  | 2.382274000000  | -7.493713000000 |
| C | -2.972213000000 | 0.277860000000  | 7.734645000000  | C | -0.606795000000 | 2.862934000000  | -7.492832000000 |
| C | -1.339863000000 | 1.989456000000  | 8.479242000000  | C | -2.149053000000 | 1.053649000000  | -8.211757000000 |
| C | 1.518375000000  | 1.971828000000  | 8.442545000000  | C | -1.838982000000 | -1.799042000000 | -8.144050000000 |
| C | 2.385828000000  | -0.757312000000 | 8.434837000000  | C | 0.971886000000  | -2.384216000000 | -8.143167000000 |
| C | 0.064059000000  | -2.423929000000 | 8.469263000000  | C | 2.396937000000  | 0.106716000000  | -8.211882000000 |
| C | -2.240679000000 | -0.725692000000 | 8.494071000000  | C | 0.467279000000  | 2.229425000000  | -8.251215000000 |
| C | -0.634356000000 | 1.019999000000  | 9.223262000000  | C | -1.110342000000 | 0.438495000000  | -8.937365000000 |
| C | 0.820311000000  | 1.010232000000  | 9.203041000000  | C | -0.952246000000 | -1.010098000000 | -8.902791000000 |
| C | 1.261793000000  | -0.379298000000 | 9.199266000000  | C | 0.474415000000  | -1.306740000000 | -8.901770000000 |
| C | 0.080733000000  | -1.227187000000 | 9.217998000000  | C | 1.198468000000  | -0.042250000000 | -8.937758000000 |
| C | -1.092384000000 | -0.362440000000 | 9.229093000000  | C | 0.218773000000  | 1.036803000000  | -8.958314000000 |
| C | -1.158780000000 | -0.373937000000 | -2.272130000000 | C | 0.246351000000  | 1.186213000000  | 2.365054000000  |
| C | 0.012405000000  | -1.235968000000 | -2.279731000000 | C | 1.208199000000  | 0.129112000000  | 2.379226000000  |
| C | 1.187514000000  | -0.390807000000 | -2.293488000000 | C | 0.499156000000  | -1.103813000000 | 2.410970000000  |
| C | 0.747626000000  | 0.994806000000  | -2.292483000000 | C | -0.896869000000 | -0.813089000000 | 2.411661000000  |
| C | -0.701924000000 | 1.005907000000  | -2.279534000000 | C | -1.056837000000 | 0.601577000000  | 2.378299000000  |
| B | -2.411800000000 | -0.774059000000 | -3.110385000000 | N | 0.512030000000  | 2.451030000000  | 2.921899000000  |
| B | 0.001106000000  | -2.551075000000 | -3.120168000000 | N | 2.496950000000  | 0.285959000000  | 2.938176000000  |
| B | 2.428563000000  | -0.808865000000 | -3.141438000000 | N | 1.038565000000  | -2.283192000000 | 2.980042000000  |
| B | 1.520027000000  | 2.048881000000  | -3.144785000000 | N | -1.858156000000 | -1.679905000000 | 2.984982000000  |
| B | -1.469202000000 | 2.067133000000  | -3.127499000000 | N | -2.176949000000 | 1.259675000000  | 2.941998000000  |
| C | -2.391540000000 | -2.083867000000 | -3.980119000000 | C | 1.708191000000  | 2.516664000000  | 3.706025000000  |
| C | -1.258355000000 | -2.918232000000 | -3.985282000000 | C | 2.652832000000  | 1.473489000000  | 3.718607000000  |
| C | 1.245376000000  | -2.938206000000 | -3.998249000000 | C | 2.905966000000  | -0.821851000000 | 3.758891000000  |
| C | 2.386786000000  | -2.119423000000 | -4.007932000000 | C | 2.203367000000  | -2.037531000000 | 3.783590000000  |
| C | 3.169135000000  | 0.259569000000  | -4.024090000000 | C | 0.099173000000  | -2.988140000000 | 3.809482000000  |
| C | 2.742392000000  | 1.601100000000  | -4.025945000000 | C | -1.275479000000 | -2.700999000000 | 3.811799000000  |
| C | 0.728909000000  | 3.090120000000  | -4.016878000000 | C | -2.826536000000 | -0.990180000000 | 3.792174000000  |
| C | -0.675867000000 | 3.097766000000  | -4.009305000000 | C | -2.984250000000 | 0.404430000000  | 3.769022000000  |
| C | -2.708776000000 | 1.636801000000  | -3.992421000000 | C | -1.838168000000 | 2.406421000000  | 3.726970000000  |
| C | -3.151399000000 | 0.302353000000  | -3.984062000000 | C | -0.557073000000 | 2.986717000000  | 3.711898000000  |
| C | -3.058649000000 | -1.759430000000 | -5.229246000000 | C | 1.419834000000  | 3.233435000000  | 4.916626000000  |
| C | -0.757164000000 | -3.458377000000 | -5.239178000000 | C | 3.322166000000  | 1.136636000000  | 4.944596000000  |
| C | 0.719482000000  | -3.467984000000 | -5.248069000000 | C | 3.479561000000  | -0.306873000000 | 4.969355000000  |
| C | 3.042044000000  | -1.801789000000 | -5.267620000000 | C | 2.073581000000  | -2.756139000000 | 5.019990000000  |
| C | 3.504824000000  | -0.398786000000 | -5.275774000000 | C | 0.749206000000  | -3.352329000000 | 5.036777000000  |
| C | 2.636693000000  | 2.327189000000  | -5.279825000000 | C | -2.012411000000 | -2.776202000000 | 5.041909000000  |
| C | 1.447761000000  | 3.204412000000  | -5.275663000000 | C | -2.987435000000 | -1.700284000000 | 5.029324000000  |
| C | -1.409896000000 | 3.223515000000  | -5.259728000000 | C | -3.301753000000 | 1.103724000000  | 4.981542000000  |
| C | -2.609295000000 | 2.362323000000  | -5.249200000000 | C | -2.581468000000 | 2.364706000000  | 4.955496000000  |
| C | -3.506618000000 | -0.351437000000 | -5.231989000000 | C | -0.002826000000 | 3.528145000000  | 4.919968000000  |
| C | -2.630772000000 | -2.352707000000 | -6.433402000000 | C | 2.087160000000  | 2.920607000000  | 6.126995000000  |
| C | -1.455202000000 | -3.219454000000 | -6.438460000000 | C | 3.057418000000  | 1.848155000000  | 6.140423000000  |
| C | 1.405006000000  | -2.239440000000 | -6.455875000000 | C | 3.375740000000  | -1.017206000000 | 6.191502000000  |
| C | 2.590698000000  | -2.387674000000 | -6.466024000000 | C | 2.655678000000  | -2.267600000000 | 6.216629000000  |
| C | 3.488528000000  | 0.328658000000  | -6.481198000000 | C | 0.026261000000  | -3.452082000000 | 6.251567000000  |
| C | 3.046054000000  | 1.720547000000  | -6.483710000000 | C | -1.385767000000 | -3.158787000000 | 6.254529000000  |
| C | 0.742609000000  | 3.419713000000  | -6.475619000000 | C | -3.325577000000 | -1.023110000000 | 6.227616000000  |

## SUPPORTING INFORMATION

|   |                 |                 |                 |   |                 |                 |                |
|---|-----------------|-----------------|-----------------|---|-----------------|-----------------|----------------|
| C | -0.716925000000 | 3.429368000000  | -6.467309000000 | C | -3.485246000000 | 0.410272000000  | 6.203826000000 |
| C | -3.042407000000 | 1.762383000000  | -6.447166000000 | C | -2.051760000000 | 2.912316000000  | 6.149946000000 |
| C | -3.499905000000 | 0.375415000000  | -6.438071000000 | C | -0.734920000000 | 3.508689000000  | 6.132868000000 |
| C | -2.628840000000 | -1.592170000000 | -7.673272000000 | C | 1.325928000000  | 2.862342000000  | 7.367316000000 |
| C | -0.735994000000 | -2.989631000000 | -7.683117000000 | C | 2.913012000000  | 1.113741000000  | 7.391358000000 |
| C | 0.671405000000  | -2.997679000000 | -7.691158000000 | C | 3.066315000000  | -0.287072000000 | 7.414456000000 |
| C | 2.582226000000  | -1.625861000000 | -7.706698000000 | C | 1.894539000000  | -2.336145000000 | 7.459162000000 |
| C | 3.025508000000  | -0.288920000000 | -7.714003000000 | C | 0.609624000000  | -2.913558000000 | 7.474083000000 |
| C | 2.312092000000  | 1.953496000000  | -7.717765000000 | C | -1.702748000000 | -2.433562000000 | 7.479529000000 |
| C | 1.177014000000  | 2.789252000000  | -7.713946000000 | C | -2.650770000000 | -1.391011000000 | 7.467908000000 |
| C | -1.175503000000 | 2.806442000000  | -7.701852000000 | C | -2.907829000000 | 0.955988000000  | 7.425977000000 |
| C | -2.319199000000 | 1.986026000000  | -7.691615000000 | C | -2.207961000000 | 2.179069000000  | 7.401055000000 |
| C | -3.056230000000 | -0.248565000000 | -7.675524000000 | C | -0.055183000000 | 3.149914000000  | 7.370134000000 |
| C | -1.460324000000 | -1.984591000000 | -8.448005000000 | C | 1.840767000000  | 1.744893000000  | 8.152745000000 |
| C | 1.398114000000  | -2.002063000000 | -8.465740000000 | C | 2.151746000000  | -1.108089000000 | 8.202710000000 |
| C | 2.298806000000  | 0.713020000000  | -8.480171000000 | C | -0.464089000000 | -2.284906000000 | 8.237029000000 |
| C | -0.006065000000 | 2.411206000000  | -8.474119000000 | C | -2.394486000000 | -0.162655000000 | 8.212160000000 |
| C | -2.327975000000 | 0.744537000000  | -8.451668000000 | C | -0.970358000000 | 2.329135000000  | 8.157575000000 |
| C | -0.757272000000 | -1.024497000000 | -9.205806000000 | C | 0.954844000000  | 0.951037000000  | 8.907325000000 |
| C | 0.697512000000  | -1.034214000000 | -9.216437000000 | C | 1.113448000000  | -0.497701000000 | 8.932887000000 |
| C | 1.155446000000  | 0.348226000000  | -9.222055000000 | C | -0.215447000000 | -1.096538000000 | 8.951187000000 |
| C | -0.017775000000 | 1.212946000000  | -9.220567000000 | C | -1.195540000000 | -0.017722000000 | 8.938100000000 |
| C | -1.198873000000 | 0.364990000000  | -9.207836000000 | C | -0.471902000000 | 1.247196000000  | 8.909181000000 |

## Reference

1. S.D. Jiang, S.S. Liu, L.N. Zhou, B.W. Wang, Z.M. Wang and S. Gao, *Inorg. Chem.*, 2012, **51**, 3079–3087.

# SUPPORTING INFORMATION

## Input files

Optimization:

```
!DKH2 DKH-def2-SVP OPT BP86 D3BJ numfreq slowconv tightSCF  
!KDIIS
```

```
%pal nprocs 32  
end
```

```
%scf  
maxiter 1000  
end
```

```
%basis newgto Dy  
0 6  
1 1205955.486947000027 0.008165729207  
2 535980.216420999961 -0.004019299653  
3 238213.429520000005 0.016042861724  
4 105872.635341999994 0.006534642408  
5 47054.504596999999 0.032501357805  
6 20913.113153999999 0.044343203836  
0 1  
7 9294.716957000001 1.000000000000  
0 1  
8 4130.985314000000 1.000000000000  
0 1  
9 1835.993473000000 1.000000000000  
0 1  
10 815.997099000000 1.000000000000  
0 1  
11 362.665377000000 1.000000000000  
0 1  
12 161.184612000000 1.000000000000  
0 1  
13 71.637605000000 1.000000000000  
0 1  
14 31.838936000000 1.000000000000  
0 1  
15 14.150638000000 1.000000000000  
0 1  
16 6.289172000000 1.000000000000  
0 1  
17 2.795188000000 1.000000000000  
0 1  
18 1.242306000000 1.000000000000  
0 1  
19 0.552136000000 1.000000000000
```

## SUPPORTING INFORMATION

0 1  
20 0.245394000000 1.000000000000  
0 1  
21 0.109064000000 1.000000000000  
0 1  
22 0.048473000000 1.000000000000  
0 1  
23 0.021543000000 1.000000000000  
1 5  
1 16500.520027999999 0.004760264705  
2 6600.208011000000 0.005897483480  
3 2640.083204000000 0.029326527847  
4 1056.033282000000 0.089161858001  
5 422.413313000000 0.265122289728  
1 1  
6 168.965325000000 1.000000000000  
1 1  
7 67.586130000000 1.000000000000  
1 1  
8 27.034452000000 1.000000000000  
1 1  
9 10.813781000000 1.000000000000  
1 1  
10 4.325512000000 1.000000000000  
1 1  
11 1.730205000000 1.000000000000  
1 1  
12 0.692082000000 1.000000000000  
1 1  
13 0.276833000000 1.000000000000  
1 1  
14 0.110733000000 1.000000000000  
1 1  
15 0.044293000000 1.000000000000  
1 1  
16 0.017717000000 1.000000000000  
2 4  
1 1185.048662000000 0.004734300415  
2 430.926786000000 0.026490774838  
3 156.700650000000 0.145474353692  
4 56.982054000000 0.463452784138  
2 1  
5 20.720747000000 1.000000000000  
2 1  
6 7.534817000000 1.000000000000  
2 1  
7 2.739933000000 1.000000000000  
2 1  
8 0.996339000000 1.000000000000  
2 1  
9 0.362305000000 1.000000000000

## SUPPORTING INFORMATION

```
2 1
10 0.131747000000 1.000000000000
2 1
11 0.047908000000 1.000000000000
2 1
12 0.017421000000 1.000000000000
3 4
1 33.836944000000 0.101241740066
2 11.278981000000 0.330021330584
3 3.759660000000 0.494377985697
4 1.253220000000 0.347706969111
3 1
5 0.417740000000 0.145206846483
3 1
6 0.139247000000 1.000000000000
end
end

%scf
directresetfreq 1
diismaxeq 25
end

%method
SpecialGridAtoms 66
SpecialGridIntAcc 9
End

*xyz charge mult
*

EDA:

#!/bin/sh

# dependency: /home/netweb/KK/Fullerne/SP/Dy4/NEW/Dy4.Region_1 Dy4.Region_1.results/adf.rkf
Region_1.rkf
# dependency: /home/netweb/KK/Fullerne/SP/Dy4/NEW/Dy4.Region_2 Dy4.Region_2.results/adf.rkf
Region_2.rkf

"$AMSBIN/ams" -n 12 << eor

Task SinglePoint
System
  Atoms
    Dy 0.0 0.0 0.0 region=Region_1 adf.f=Region_1
    C 0.6312489999999999 -1.171237 -2.264617 region=Region_1 adf.f=Region_1
    C 1.859401 -0.648065 -1.751772 region=Region_1 adf.f=Region_1
    C 1.774261 0.766969 -1.771127 region=Region_1 adf.f=Region_1
    C 0.494993 1.125825 -2.296794 region=Region_1 adf.f=Region_1
    C -0.201122 -0.073492 -2.611613 region=Region_1 adf.f=Region_1
```



## SUPPORTING INFORMATION

C 0.47185 -2.568643 -2.818229 region=Region\_1 adf.f=Region\_1  
C 3.152247 -1.422207 -1.673853 region=Region\_1 adf.f=Region\_1  
C 2.963824 1.693404 -1.713333 region=Region\_1 adf.f=Region\_1  
C 0.167448 2.480909 -2.879964 region=Region\_1 adf.f=Region\_1  
C -1.372982 -0.155102 -3.562211 region=Region\_1 adf.f=Region\_1  
C 1.87745 -3.021305 -3.28173 region=Region\_1 adf.f=Region\_1  
C 3.071462 -2.510729 -2.773063 region=Region\_1 adf.f=Region\_1  
C 4.25121 -0.495268 -2.24906 region=Region\_1 adf.f=Region\_1  
C 4.167673 0.892976 -2.265871 region=Region\_1 adf.f=Region\_1  
C 2.754909 2.739749 -2.836399 region=Region\_1 adf.f=Region\_1  
C 1.508411 3.09061 -3.355436 region=Region\_1 adf.f=Region\_1  
C -0.54216 2.212953 -4.230619 region=Region\_1 adf.f=Region\_1  
C -1.23093 1.041325 -4.53326 region=Region\_1 adf.f=Region\_1  
C -1.085883 -1.347556 -4.504758 region=Region\_1 adf.f=Region\_1  
C -0.262171 -2.420837 -4.174727 region=Region\_1 adf.f=Region\_1  
C 1.812755 -3.435914 -4.661457 region=Region\_1 adf.f=Region\_1  
C 4.224742 -2.408748 -3.631317 region=Region\_1 adf.f=Region\_1  
C 4.944812 -1.180627 -3.313561 region=Region\_1 adf.f=Region\_1  
C 4.774583 1.63109 -3.348001 region=Region\_1 adf.f=Region\_1  
C 3.913131 2.756922 -3.693764 region=Region\_1 adf.f=Region\_1  
C 1.395936 3.459254 -4.744995 region=Region\_1 adf.f=Region\_1  
C 0.144575 2.928469 -5.278111 region=Region\_1 adf.f=Region\_1  
C -1.244405 0.556414 -5.89301 region=Region\_1 adf.f=Region\_1  
C -1.155534 -0.899965 -5.875246 region=Region\_1 adf.f=Region\_1  
C 0.507213 -3.072641 -5.205734 region=Region\_1 adf.f=Region\_1  
C 2.952208 -3.403799 -5.492886 region=Region\_1 adf.f=Region\_1  
C 4.194034 -2.878591 -4.963579 region=Region\_1 adf.f=Region\_1  
C 5.604454 -0.466471 -4.336194 region=Region\_1 adf.f=Region\_1  
C 5.516565 0.977259 -4.35404 region=Region\_1 adf.f=Region\_1  
C 3.827342 3.186337 -5.03752 region=Region\_1 adf.f=Region\_1  
C 2.531924 3.546549 -5.577367 region=Region\_1 adf.f=Region\_1  
C 0.07897 2.502849 -6.622266 region=Region\_1 adf.f=Region\_1  
C -0.635817 1.28401 -6.937202 region=Region\_1 adf.f=Region\_1  
C -0.462153 -1.573042 -6.902914 region=Region\_1 adf.f=Region\_1  
C 0.393201 -2.690084 -6.56027 region=Region\_1 adf.f=Region\_1  
C 2.835926 -2.990603 -6.886507 region=Region\_1 adf.f=Region\_1  
C 4.853636 -2.125834 -6.021855 region=Region\_1 adf.f=Region\_1  
C 5.547988 -0.940053 -5.717349 region=Region\_1 adf.f=Region\_1  
C 5.405977 1.407315 -5.746142 region=Region\_1 adf.f=Region\_1  
C 4.574901 2.49465 -6.078275 region=Region\_1 adf.f=Region\_1  
C 2.467952 3.087945 -6.9596 region=Region\_1 adf.f=Region\_1  
C 1.259758 2.573066 -7.475086 region=Region\_1 adf.f=Region\_1  
C 0.101126 0.586608 -7.986548 region=Region\_1 adf.f=Region\_1  
C 0.186344 -0.816584 -7.969052 region=Region\_1 adf.f=Region\_1  
C 1.574547 -2.638247 -7.412986 region=Region\_1 adf.f=Region\_1  
C 4.010126 -2.193511 -7.212597 region=Region\_1 adf.f=Region\_1  
C 5.42976 0.221005 -6.588218 region=Region\_1 adf.f=Region\_1  
C 3.730869 2.430518 -7.268505 region=Region\_1 adf.f=Region\_1  
C 1.274973 1.386915 -8.318153000000001 region=Region\_1 adf.f=Region\_1  
C 1.449334 -1.477224 -8.281931 region=Region\_1 adf.f=Region\_1  
C 3.892271 -1.068413 -8.055312000000001 region=Region\_1 adf.f=Region\_1

## SUPPORTING INFORMATION

C 4.612229 0.157286 -7.742793 region=Region\_1 adf.f=Region\_1  
C 3.749022 1.279685 -8.082916000000001 region=Region\_1 adf.f=Region\_1  
C 2.498455 0.747812 -8.619802 region=Region\_1 adf.f=Region\_1  
C 2.586356 -0.703345 -8.6012 region=Region\_1 adf.f=Region\_1  
C -0.203647 -3.562599 -1.848564 region=Region\_1 adf.f=Region\_1  
C 3.485352 -1.970071 -0.267847 region=Region\_1 adf.f=Region\_1  
C 3.218959 2.311196 -0.320182 region=Region\_1 adf.f=Region\_1  
C -0.625424 3.405918 -1.931353 region=Region\_1 adf.f=Region\_1  
C -2.749319 -0.228984 -2.865674 region=Region\_1 adf.f=Region\_1  
H 0.393076 -3.655498 -0.92314 region=Region\_1 adf.f=Region\_1  
H -0.290054 -4.562223 -2.30867 region=Region\_1 adf.f=Region\_1  
H -1.216072 -3.210574 -1.577994 region=Region\_1 adf.f=Region\_1  
H 3.556232 -1.13929 0.457716 region=Region\_1 adf.f=Region\_1  
H 4.447807 -2.510797 -0.275958 region=Region\_1 adf.f=Region\_1  
H 2.698717 -2.667484 0.07342799999999999 region=Region\_1 adf.f=Region\_1  
H 3.391499 1.515675 0.428404 region=Region\_1 adf.f=Region\_1  
H 2.348927 2.913244 0.0002 region=Region\_1 adf.f=Region\_1  
H 4.105532 2.968546 -0.338222 region=Region\_1 adf.f=Region\_1  
H -0.045428 3.59563 -1.009475 region=Region\_1 adf.f=Region\_1  
H -1.586458 2.9374 -1.649915 region=Region\_1 adf.f=Region\_1  
H -0.835122 4.376185 -2.414534 region=Region\_1 adf.f=Region\_1  
H -2.79811 -1.115267 -2.205945 region=Region\_1 adf.f=Region\_1  
H -3.565863 -0.3003 -3.606214 region=Region\_1 adf.f=Region\_1  
H -2.916414 0.673692 -2.248751 region=Region\_1 adf.f=Region\_1  
C -0.775998 0.69718 2.335601 region=Region\_2 adf.f=Region\_2  
C 0.726545 0.717894 2.427545 region=Region\_2 adf.f=Region\_2  
C -0.726822 -0.719589 2.413004 region=Region\_2 adf.f=Region\_2  
C 0.776275 -0.695485 2.353012 region=Region\_2 adf.f=Region\_2  
H 1.563168 -1.442226 2.491296 region=Region\_2 adf.f=Region\_2  
H 1.476943 1.505628 2.558332 region=Region\_2 adf.f=Region\_2  
H -1.55808 1.443663 2.494867 region=Region\_2 adf.f=Region\_2  
H -1.472561 -1.509175 2.552805 region=Region\_2 adf.f=Region\_2

End

BondOrders

1 82 1.0  
1 83 1.0  
1 84 1.0  
1 85 1.0  
2 3 1.5  
2 6 1.5  
2 7 1.0  
3 4 1.5  
3 8 1.0  
4 5 1.5  
4 9 1.0  
5 6 1.5  
5 10 1.0  
6 11 1.0  
7 12 1.0  
7 21 1.0  
7 62 1.0

## SUPPORTING INFORMATION

8 13 1.0  
8 14 1.0  
8 63 1.0  
9 15 1.0  
9 16 1.0  
9 64 1.0  
10 17 1.0  
10 18 1.0  
10 65 1.0  
11 19 1.0  
11 20 1.0  
11 66 1.0  
12 13 1.5  
12 22 1.5  
13 23 1.5  
14 15 1.5  
14 24 1.5  
15 25 1.5  
16 17 1.5  
16 26 1.5  
17 27 1.5  
18 19 1.5  
18 28 1.5  
19 29 1.5  
20 21 1.5  
20 30 1.5  
21 31 1.5  
22 31 1.0  
22 32 1.5  
23 24 1.0  
23 33 1.5  
24 34 1.5  
25 26 1.0  
25 35 1.5  
26 36 1.5  
27 28 1.0  
27 37 1.5  
28 38 1.5  
29 30 1.0  
29 39 1.5  
30 40 1.5  
31 41 1.5  
32 33 1.5  
32 42 1.0  
33 43 1.0  
34 35 1.5  
34 44 1.0  
35 45 1.0  
36 37 1.5  
36 46 1.0  
37 47 1.0

## SUPPORTING INFORMATION

38 39 1.5  
38 48 1.0  
39 49 1.0  
40 41 1.5  
40 50 1.0  
41 51 1.0  
42 51 2.0  
42 52 1.0  
43 44 2.0  
43 52 1.0  
44 53 1.0  
45 46 2.0  
45 53 1.0  
46 54 1.0  
47 48 2.0  
47 54 1.0  
48 55 1.0  
49 50 2.0  
49 55 1.0  
50 56 1.0  
51 56 1.0  
52 57 2.0  
53 58 2.0  
54 59 2.0  
55 60 2.0  
56 61 2.0  
57 58 1.0  
57 61 1.0  
58 59 1.0  
59 60 1.0  
60 61 1.0  
62 67 1.0  
62 68 1.0  
62 69 1.0  
63 70 1.0  
63 71 1.0  
63 72 1.0  
64 73 1.0  
64 74 1.0  
64 75 1.0  
65 76 1.0  
65 77 1.0  
65 78 1.0  
66 79 1.0  
66 80 1.0  
66 81 1.0  
82 83 1.5  
82 84 1.5  
82 88 1.0  
83 85 1.5  
83 87 1.0

## SUPPORTING INFORMATION

84 85 1.5

84 89 1.0

85 86 1.0

End

End

Engine ADF

Basis

Core None

PerAtomType Symbol=Dy File=ZORA/TZP/Dy

PerAtomType Symbol=C File=ZORA/DZP/C

PerAtomType Symbol=H File=ZORA/DZP/H

End

SpinPolarization 5

Fragments

Region\_1 =/home/netweb/KK/Fullerne/SP/Dy4/NEW/1/ams.results/adf.rkf

Region\_2 =/home/netweb/KK/Fullerne/SP/Dy4/NEW/2/ams.results/adf.rkf

End

Save TAPE15

Print ETSLOWDIN-Unrestricted

XC

Hybrid PBE0

DISPERSION GRIMME3 BJDAMP

End

Symmetry NOSYM

Unrestricted Yes

BeckeGrid

Quality Good

End

LOCORB

END

NumericalQuality Good

FullFock Yes

AOMat2File Yes

UnrestrictedFragments Yes

ETSNOCV

Enabled Yes

End

QTAIM

Enabled Yes

End

SCF

DIIS

N 20

Cyc 25

End

Mixing 0.015

Mixing1 0.09

Iterations 3000

End

## SUPPORTING INFORMATION

EndEngine  
Eor

### CASSCF calculations:

!DKH2 DKH-def2-svp slowconv tightscf autoaux

!moread

%moinp "/scratch/subhamsau.chy.iith/Fullerne\_OPT/Dy\_2F/DKH/CAS/Dy4/ro.gbw"

%pal nprocs 32

end

%Maxcore 15000

%basis newgto Dy

0 6

1 1205955.486947000027 0.008165729207

2 535980.216420999961 -0.004019299653

3 238213.429520000005 0.016042861724

4 105872.635341999994 0.006534642408

5 47054.504596999999 0.032501357805

6 20913.113153999999 0.044343203836

0 1

7 9294.716957000001 1.000000000000

0 1

8 4130.985314000000 1.000000000000

0 1

9 1835.993473000000 1.000000000000

0 1

10 815.997099000000 1.000000000000

0 1

11 362.665377000000 1.000000000000

0 1

12 161.184612000000 1.000000000000

0 1

13 71.637605000000 1.000000000000

0 1

14 31.838936000000 1.000000000000

0 1

15 14.150638000000 1.000000000000

0 1

16 6.289172000000 1.000000000000

0 1

17 2.795188000000 1.000000000000

0 1

18 1.242306000000 1.000000000000

0 1

19 0.552136000000 1.000000000000

0 1

## SUPPORTING INFORMATION

20 0.245394000000 1.000000000000  
0 1  
21 0.109064000000 1.000000000000  
0 1  
22 0.048473000000 1.000000000000  
0 1  
23 0.021543000000 1.000000000000  
1 5  
1 16500.520027999999 0.004760264705  
2 6600.208011000000 0.005897483480  
3 2640.083204000000 0.029326527847  
4 1056.033282000000 0.089161858001  
5 422.413313000000 0.265122289728  
1 1  
6 168.965325000000 1.000000000000  
1 1  
7 67.586130000000 1.000000000000  
1 1  
8 27.034452000000 1.000000000000  
1 1  
9 10.813781000000 1.000000000000  
1 1  
10 4.325512000000 1.000000000000  
1 1  
11 1.730205000000 1.000000000000  
1 1  
12 0.692082000000 1.000000000000  
1 1  
13 0.276833000000 1.000000000000  
1 1  
14 0.110733000000 1.000000000000  
1 1  
15 0.044293000000 1.000000000000  
1 1  
16 0.017717000000 1.000000000000  
2 4  
1 1185.048662000000 0.004734300415  
2 430.926786000000 0.026490774838  
3 156.700650000000 0.145474353692  
4 56.982054000000 0.463452784138  
2 1  
5 20.720747000000 1.000000000000  
2 1  
6 7.534817000000 1.000000000000  
2 1  
7 2.739933000000 1.000000000000  
2 1  
8 0.996339000000 1.000000000000  
2 1  
9 0.362305000000 1.000000000000  
2 1

## SUPPORTING INFORMATION

```
10 0.131747000000 1.000000000000
2 1
11 0.047908000000 1.000000000000
2 1
12 0.017421000000 1.000000000000
3 4
1 33.836944000000 0.101241740066
2 11.278981000000 0.330021330584
3 3.759660000000 0.494377985697
4 1.253220000000 0.347706969111
3 1
5 0.417740000000 0.145206846483
3 1
6 0.139247000000 1.000000000000
end
end
```

```
%method
SpecialGridAtoms 66
SpecialGridIntAcc 9
end
```

```
%casscf
nel 9
norb 7
mult 6
nroots 21
trafostep ri
maxiter 100
nevpt2 true
actorbs forbs
ci
nguessmat 4000
maxiter 100
end
```

```
rel
dosoc true
gtensor true
printlevel 3
NDoubGTensor 8
domagnetization true
dosusceptibility true
```

```
SUSTempMIN 2.0
SUSTempMAX 300.0
SUSNPoints 100
```

```
MAGTemperatureMIN 2.0
MAGTemperatureMAX 5.0
MAGTemperatureNPoints 4
```



## SUPPORTING INFORMATION

MAGFieldMIN 0.0  
MAGFieldMAX 70000.0  
MAGNpoints 15

end

ANISO  
doaniso true  
MLTP 2,2,2,2,2,2,2,2  
TINT 0, 300, 100  
HINT 0, 7.0, 10  
TMAG 2.0, 3.0, 5.0  
CRYS\_element "Dy"  
CRYS\_charge 3  
PLOT true  
UBAR true  
end  
end

\*xyz 0 6  
\*
